# Supplementary material for: Selective optimisation of catalytic activity by tuning the structural composition in nanoparticulate CuFe2O4
Source: Royal Society of Chemistry journal article supplement (doi:10.1039/d4se00968a), 2024-01-01
Supplement: d4se00968a1.pdf [file d4se00968a1.pdf]

## Selective optimisation of catalytic activity by tuning the structural composition in nanoparticulate $\text{CuFe}_2\text{O}_4$

J. Zander, M. F. Fink, M. Attia, C. Roth, R. Marschall

### Supporting Information

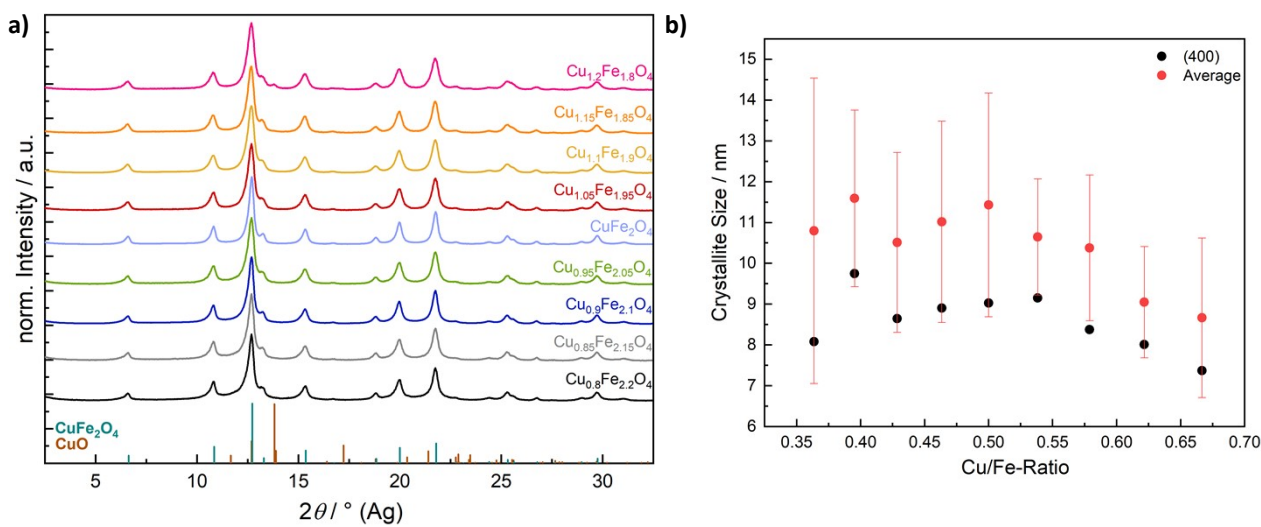

**Figure S1** Ag-XRD patterns for  $\text{CuFe}_2\text{O}_4$  with different Cu/Fe-ratios elucidating phase-purity over a wide range of compositions (a) and crystallite sizes determined by the integral breadth method from the Cu-XRD data (b).

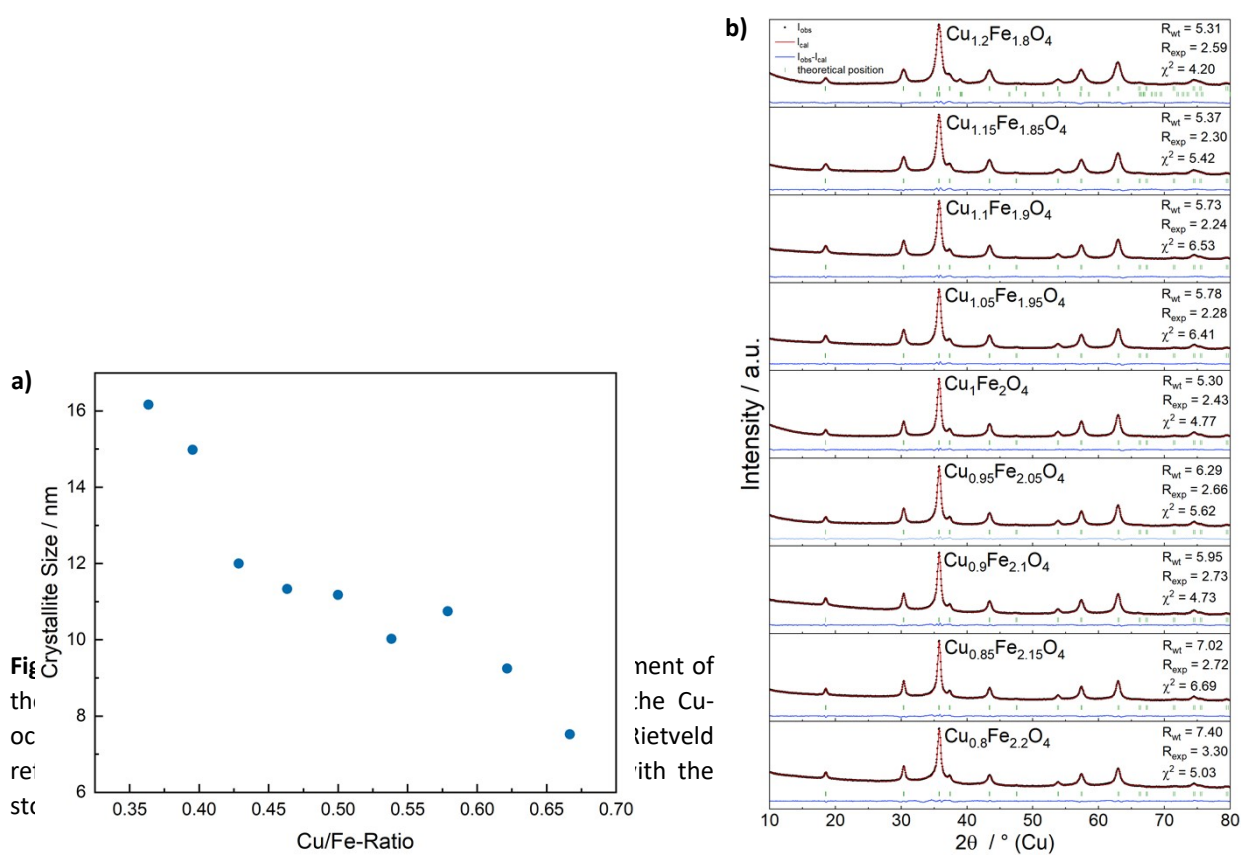

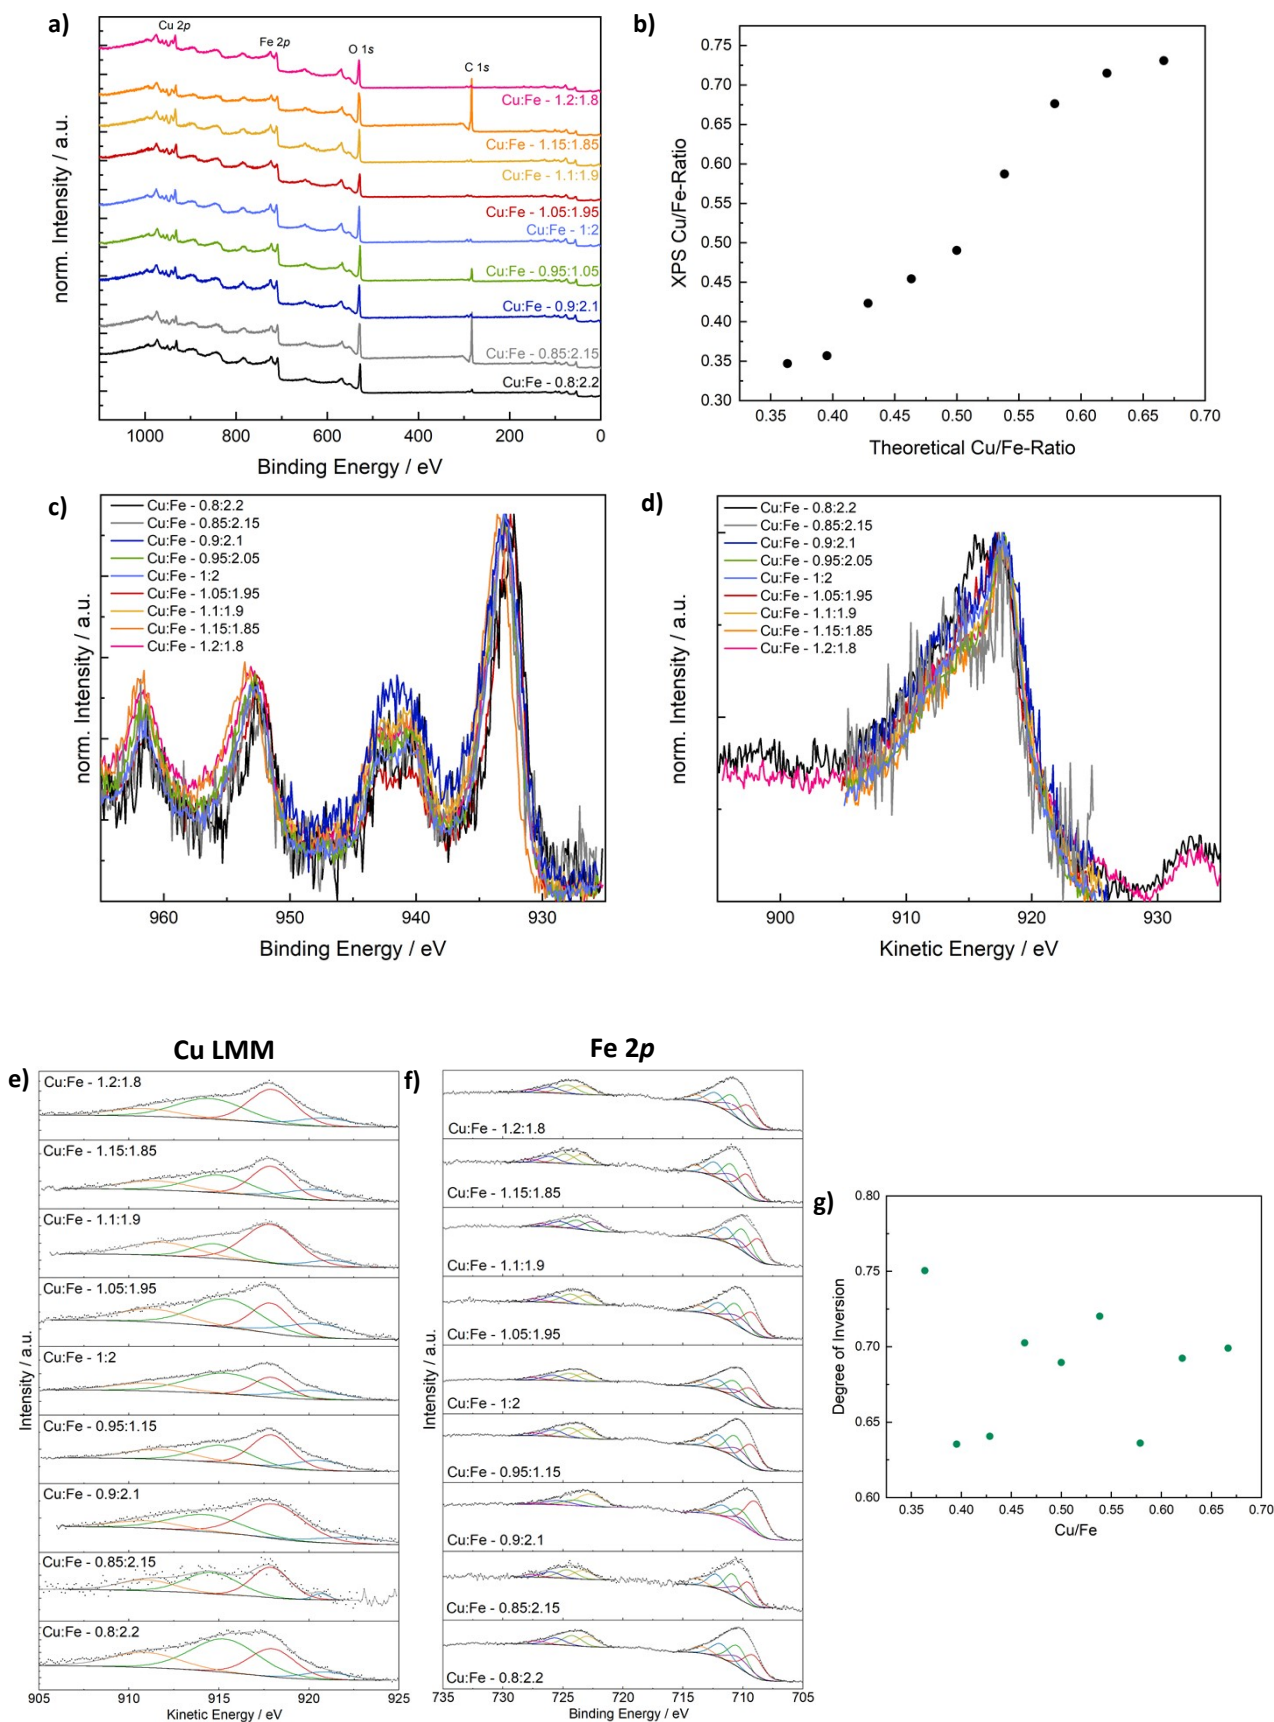

**Figure S3** XP spectra of  $\text{CuFe}_2\text{O}_4$  with different Cu/Fe-ratios. Survey scans are shown in (a), derived Cu/Fe ratios in (b), normalised Cu 2p spectra in (c), normalised Cu  $\text{L}_3\text{M}_{4,5}\text{M}_{4,5}$  Auger spectra in (d) and the derived degree of inversion in (g). The fitted Cu  $\text{L}_3\text{M}_{4,5}\text{M}_{4,5}$  spectra and Fe 2p spectra are shown in (e) and (f), respectively. The parameters for CuO (Auger) and  $\text{NiFe}_2\text{O}_4$  (Fe 2p) reported by Biesinger *et al.* were used for the fit.<sup>[1,2]</sup>

**Table S1** Elemental composition derived from XPS survey scans.

| Cu:Fe- Ratio | Cu / at.% | Fe / at.% | O / at.% | C / at.% | K / at.% | Si / at.% | Cu/Fe |
|--------------|-----------|-----------|----------|----------|----------|-----------|-------|
| 0.8:2.2      | 7.42      | 21.39     | 54.7     | 14.78    | 1.38     | 0.33      | 0.35  |
| 0.85:2.15    | 2.61      | 7.31      | 29.18    | 58.96    |          | 1.68      | 0.36  |
| 0.9:2.1      | 10.02     | 23.67     | 49.45    | 11.42    | 1.4      | 4.03      | 0.42  |
| 0.95:2.05    | 7.38      | 16.25     | 44.17    | 30.34    | 0.47     | 1.39      | 0.45  |
| 1:2          | 10.44     | 21.29     | 55.08    | 8.06     | 1.42     | 3.71      | 0.49  |
| 1.05:1.95    | 11.13     | 18.96     | 57.28    | 7.1      | 2.17     | 3.37      | 0.59  |
| 1.1:1.9      | 13.04     | 19.29     | 54.63    | 7.9      | 1.33     | 3.8       | 0.68  |
| 1.15:1.855   | 3.41      | 4.77      | 26.69    | 63.21    |          | 1.93      | 0.71  |
| 1.2:1.8      | 12.76     | 17.46     | 59.3     | 6.77     | 0.85     | 2.86      | 0.73  |

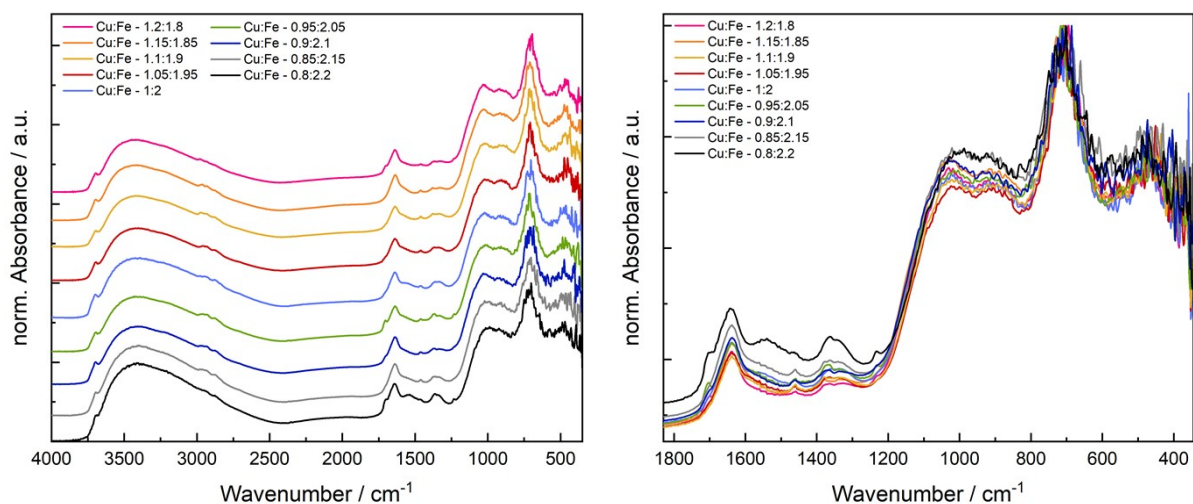

**Figure S4** DRIFT spectra of  $\text{CuFe}_2\text{O}_4$  with different Cu/Fe-ratios, showing a similar amount of residual surface organics from the synthesis and highly comparable relative intensities for M-O vibrations at tetrahedral and octahedral sites, suggesting strong structural similarities.

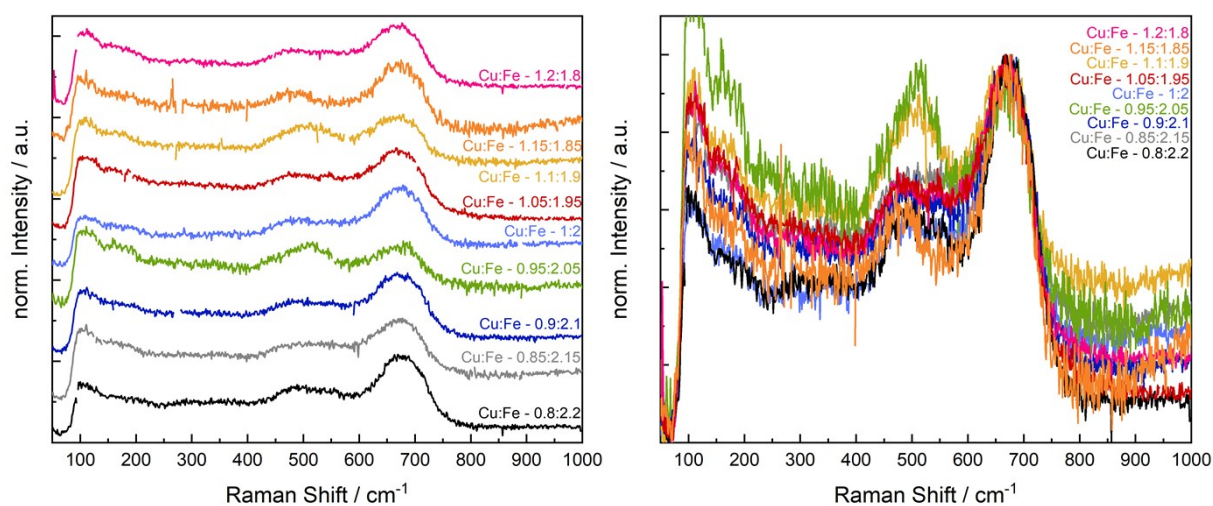

**Figure S5** Raman spectra of  $\text{CuFe}_2\text{O}_4$  with different Cu/Fe-ratios, elucidating the absence of Fe-oxide impurities and supporting structural comparability.

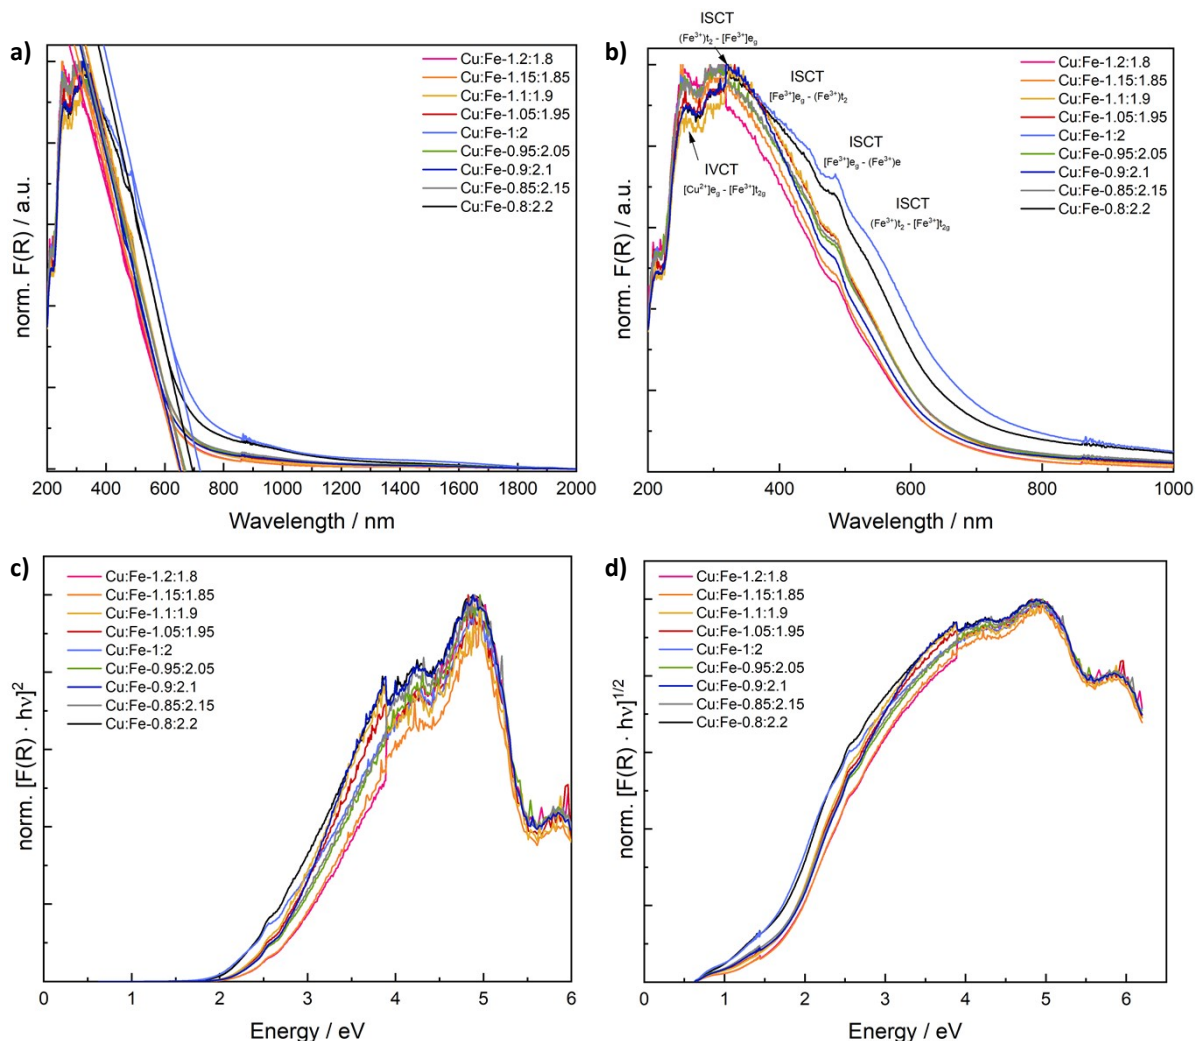

**Figure S6** UV/vis measurements of CuFe<sub>2</sub>O<sub>4</sub> with different Cu/Fe-ratios. Fitted Kubelka-Munk plots are shown in (a), optical charge transfer transitions are elucidated in (b) and direct and indirect Tauc plots are depicted in (c) and (d), respectively.

**Table S2** Band gap values of CuFe<sub>2</sub>O<sub>4</sub> with different Cu/Fe-ratios.

| Cu:Fe- Ratio | Kubelka-Munk    | direct Tauc | indirect Tauc    |
|--------------|-----------------|-------------|------------------|
| 0.8:2.2      | 693 nm/ 1.79 eV | 2.33 eV     | 1.47 eV/ 0.75 eV |
| 0.85:2.15    | 667 nm/ 1.86 eV | 2.49 eV     | 1.53 eV/ 0.74 eV |
| 0.9:2.1      | 653 nm/ 1.90 eV | 2.59 eV     | 1.59 eV/ 0.76 eV |
| 0.95:2.05    | 669 nm/ 1.85 eV | 2.51 eV     | 1.54 eV/ 0.75 eV |
| 1:2          | 719 nm/ 1.72 eV | 2.31 eV     | 1.42 eV/ 0.78 eV |
| 1.05:1.95    | 664 nm/ 1.87 eV | 2.49 eV     | 1.55 eV/ 0.81 eV |
| 1.1:1.9      | 665 nm/ 1.86 eV | 2.49 eV     | 1.56 eV/ 0.82 eV |
| 1.15:1.855   | 649 nm/ 1.91 eV | 2.56 eV     | 1.57 eV/ 0.86 eV |
| 1.2:1.8      | 651 nm/ 1.90 eV | 2.56 eV     | 1.55 eV/ 0.88 eV |

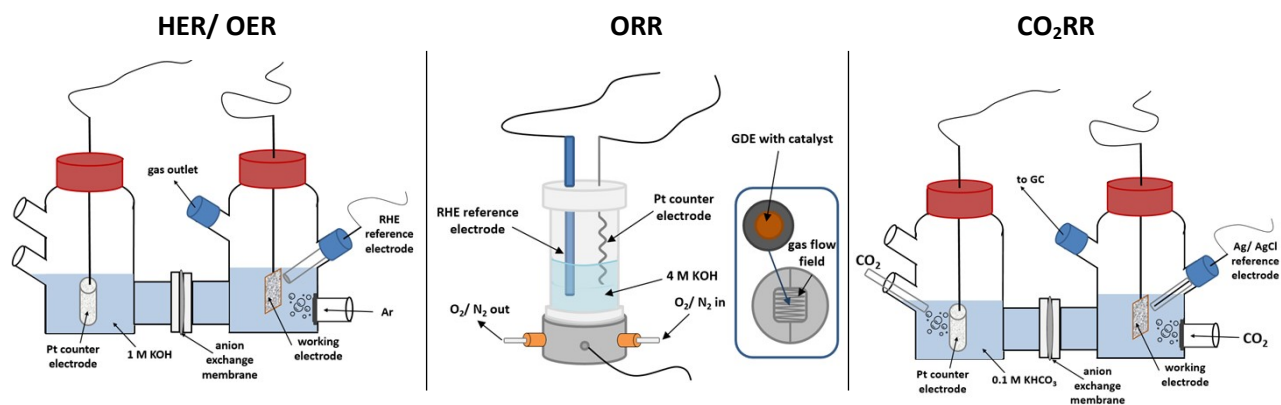

**Figure S7** Schemes of reaction cells/ setups employed in this study.

**Table S3** Overpotentials for the HER and OER with  $\text{CuFe}_2\text{O}_4$  with different Cu/Fe-ratios.

| Cu:Fe- Ratio | $\eta_{\text{HER}} - 10 \text{ mAcm}^{-2}$ | $\eta_{\text{HER}} - 100 \text{ mAcm}^{-2}$ | $\eta_{\text{OER}} - 10 \text{ mAcm}^{-2}$ | $\eta_{\text{OER}} - 5 \text{ mAcm}^{-2}$ |
|--------------|--------------------------------------------|---------------------------------------------|--------------------------------------------|-------------------------------------------|
| 0.8:2.2      | 415 mV                                     | 577 mV                                      | --                                         | 721 mV                                    |
| 0.85:2.15    | 401 mV                                     | 574 mV                                      | --                                         | 708 mV                                    |
| 0.9:2.1      | 433 mV                                     | 579 mV                                      | --                                         | 697 mV                                    |
| 0.95:2.05    | 405 mV                                     | 516 mV                                      | 735 mV                                     | 671 mV                                    |
| 1:2          | 394 mV                                     | 559 mV                                      | --                                         | 749 mV                                    |
| 1.05:1.95    | 374 mV                                     | 499 mV                                      | 765 mV                                     | 665 mV                                    |
| 1.1:1.9      | 357 mV                                     | 485 mV                                      | 764 mV                                     | 674 mV                                    |
| 1.15:1.855   | 371 mV                                     | 507 mV                                      | 684 mV                                     | 589 mV                                    |
| 1.2:1.8      | 342 mV                                     | 488 mV                                      | --                                         | 690 mV                                    |

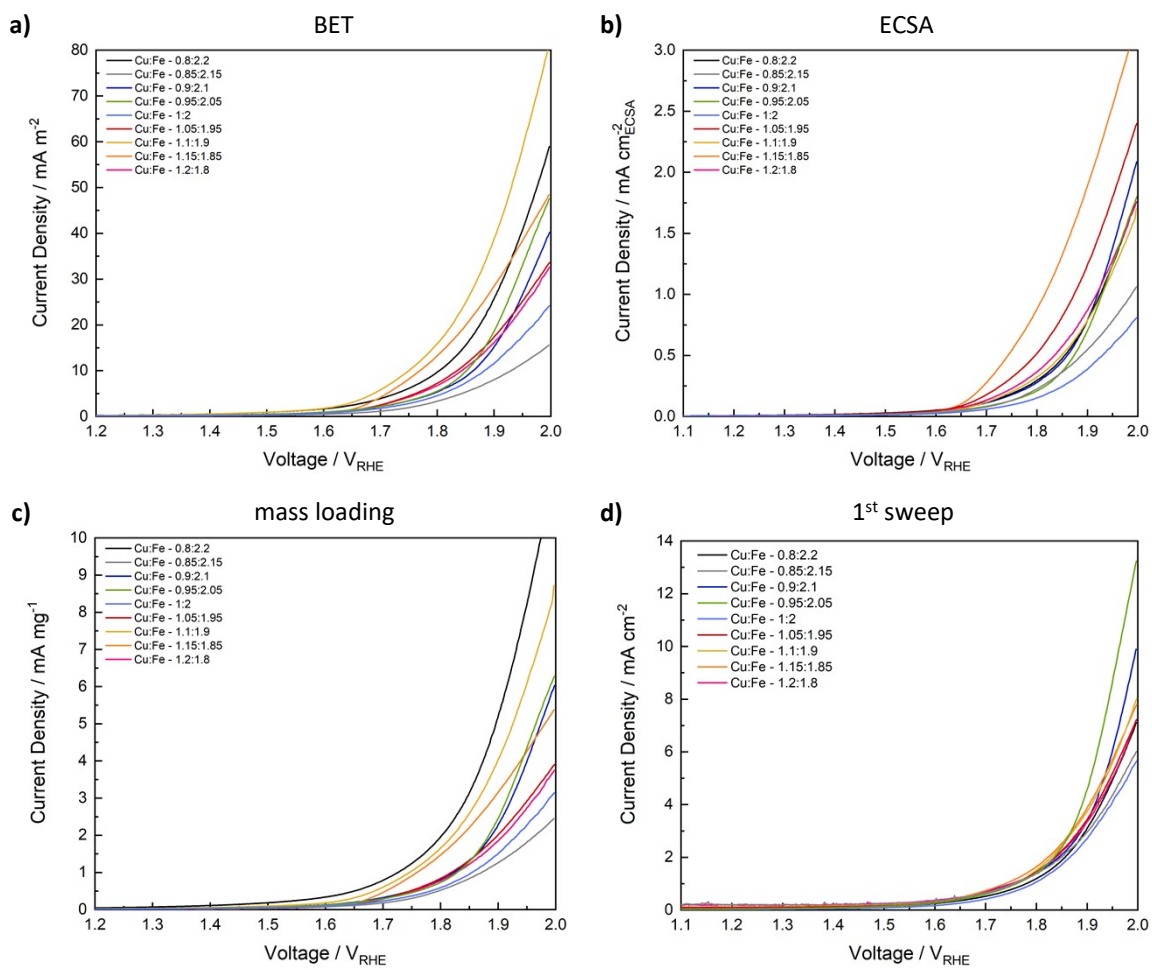

**Figure S8** Final LSV corrected by the BET surface area (a), the ECSA determined after the LSVs (b), and the loaded mass (c). The first sweeps are shown in (d) for comparison.

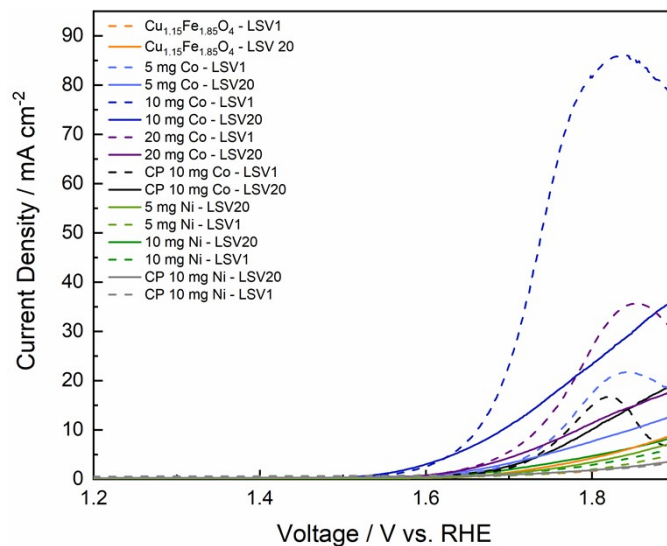

**Figure S9** Linear sweep voltammetry to determine the activity of  $\text{Cu}_{1.15}\text{Fe}_{1.85}\text{O}_4$  for the OER in the presence of low amounts of Co or Ni.

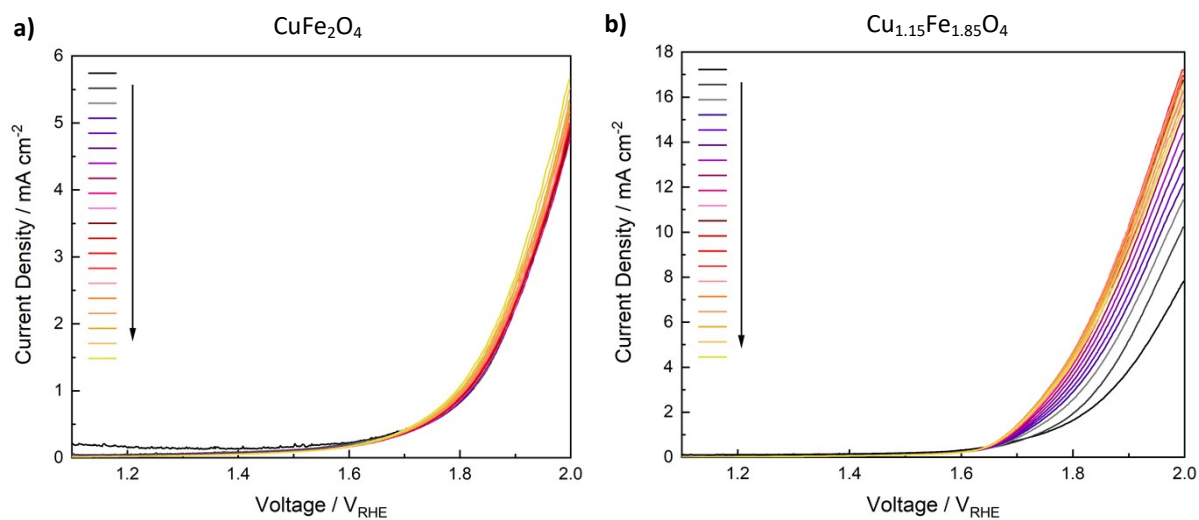

**Figure S10** Current development with the number of anodic sweeps for both stoichiometric  $\text{CuFe}_2\text{O}_4$  (a) and the most active composition of  $\text{Cu}_{1.15}\text{Fe}_{1.85}\text{O}_4$  (b).



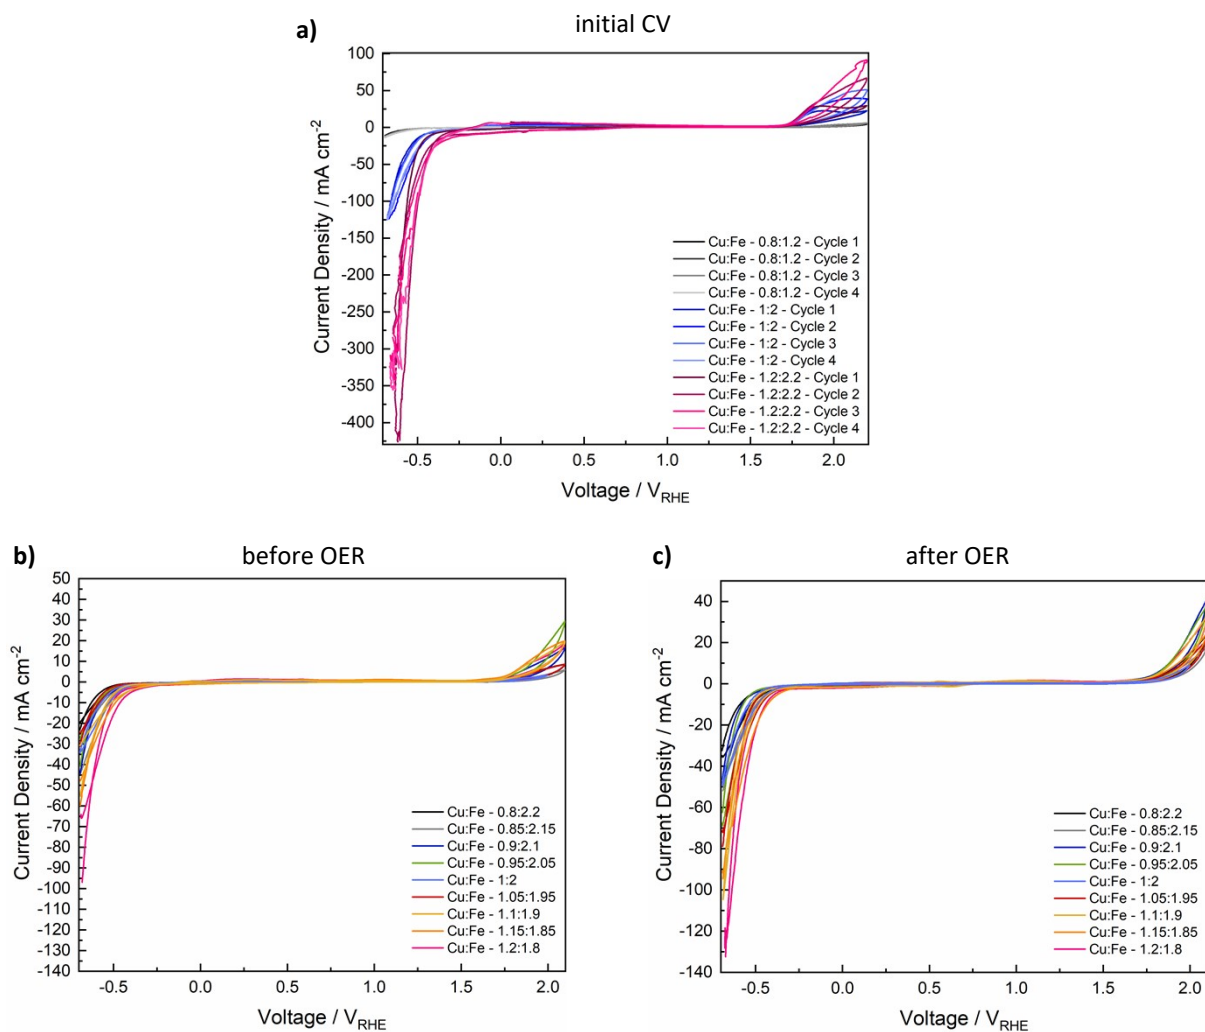

**Figure S11** Changes in the initial CVs before the electrochemical measurements (in this case HER) are shown in (a). The third cycle for  $\text{CuFe}_2\text{O}_4$  of different compositions are depicted in (b) before the OER and in (c) after.

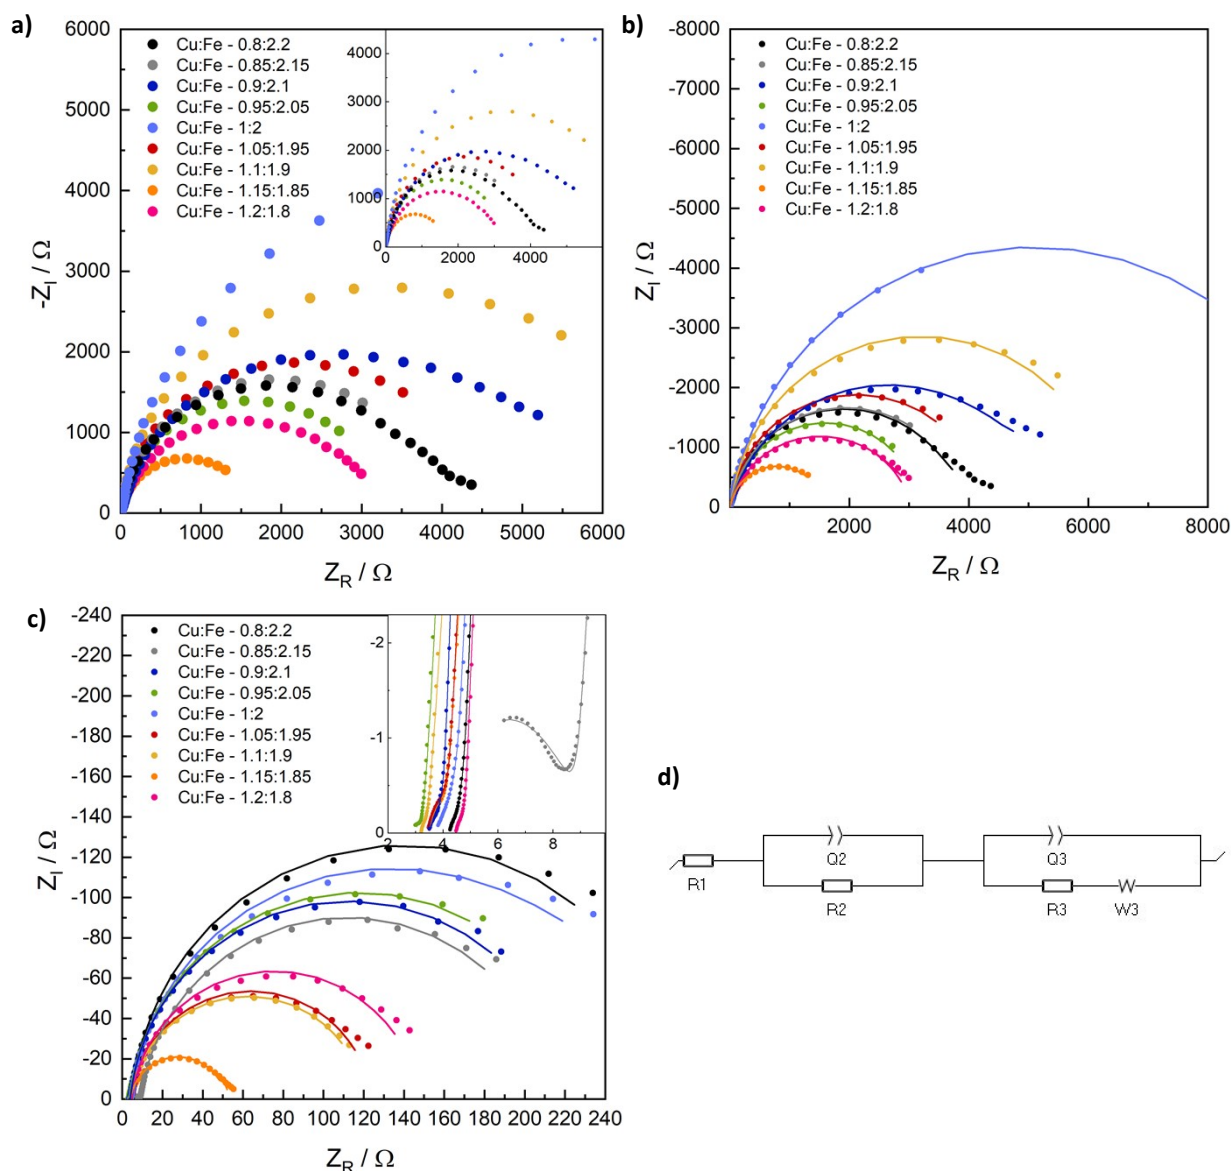

**Figure S12** Nyquist plots at 1.7 V before the OER experiments (a), corresponding fits (b), and fitted Nyquist diagrams after the OER (c), together with the equivalent circuit used (d).

**Table S4** Fit parameters for the Nyquist plots before and after the OER.

| Cu/Fe | Before OER     |                           |                |                           |                | After OER      |                           |                |                           |                |
|-------|----------------|---------------------------|----------------|---------------------------|----------------|----------------|---------------------------|----------------|---------------------------|----------------|
|       | $R_1 / \Omega$ | $Q_2 / F \cdot s^{(a-1)}$ | $R_2 / \Omega$ | $Q_3 / F \cdot s^{(a-1)}$ | $R_3 / \Omega$ | $R_1 / \Omega$ | $Q_2 / F \cdot s^{(a-1)}$ | $R_2 / \Omega$ | $Q_3 / F \cdot s^{(a-1)}$ | $R_3 / \Omega$ |
| 0.36  | 4.007          | 0.0027                    | 1.076          | 7.48E-6                   | 3705           | 4.215          | 0.016                     | 0.816          | 0.693                     | 270            |
| 0.40  | 0.727          | 0.044                     | 123.9          | 4.93E-5                   | 3663           | 3.675          | 0.166                     | 5.369          | 0.824                     | 204.2          |
| 0.43  | 3.671          | 4.35E-4                   | 16.36          | 0.851                     | 5027           | 3.506          | 0.00269                   | 0.568          | 7.88E-4                   | 213.4          |
| 0.46  | 3.266          | 0.00153                   | 24.65          | 4.81E-5                   | 3153           | 2.837          | 0.363                     | 3.606          | 0.00104                   | 226.8          |
| 0.5   | 4.425          | 0.557                     | 6.21           | 1.04E-5                   | 9944           | 3.799          | 0.0032                    | 0.876          | 0.574                     | 238.4          |
| 0.54  | 3.794          | 0.00186                   | 12.67          | 4.10E-5                   | 4080           | 3.456          | 0.00117                   | 0.823          | 7.99E-4                   | 119.6          |
| 0.58  | 3.439          | 0.624                     | 13.38          | 2.54E-5                   | 6377           | 3.117          | 0.286                     | 2.741          | 0.001                     | 115.9          |
| 0.62  | 3.548          | 0.005                     | 37.13          | 1.13E-4                   | 1503           | 3.502          | 0.00113                   | 0.726          | 0.849                     | 47.21          |

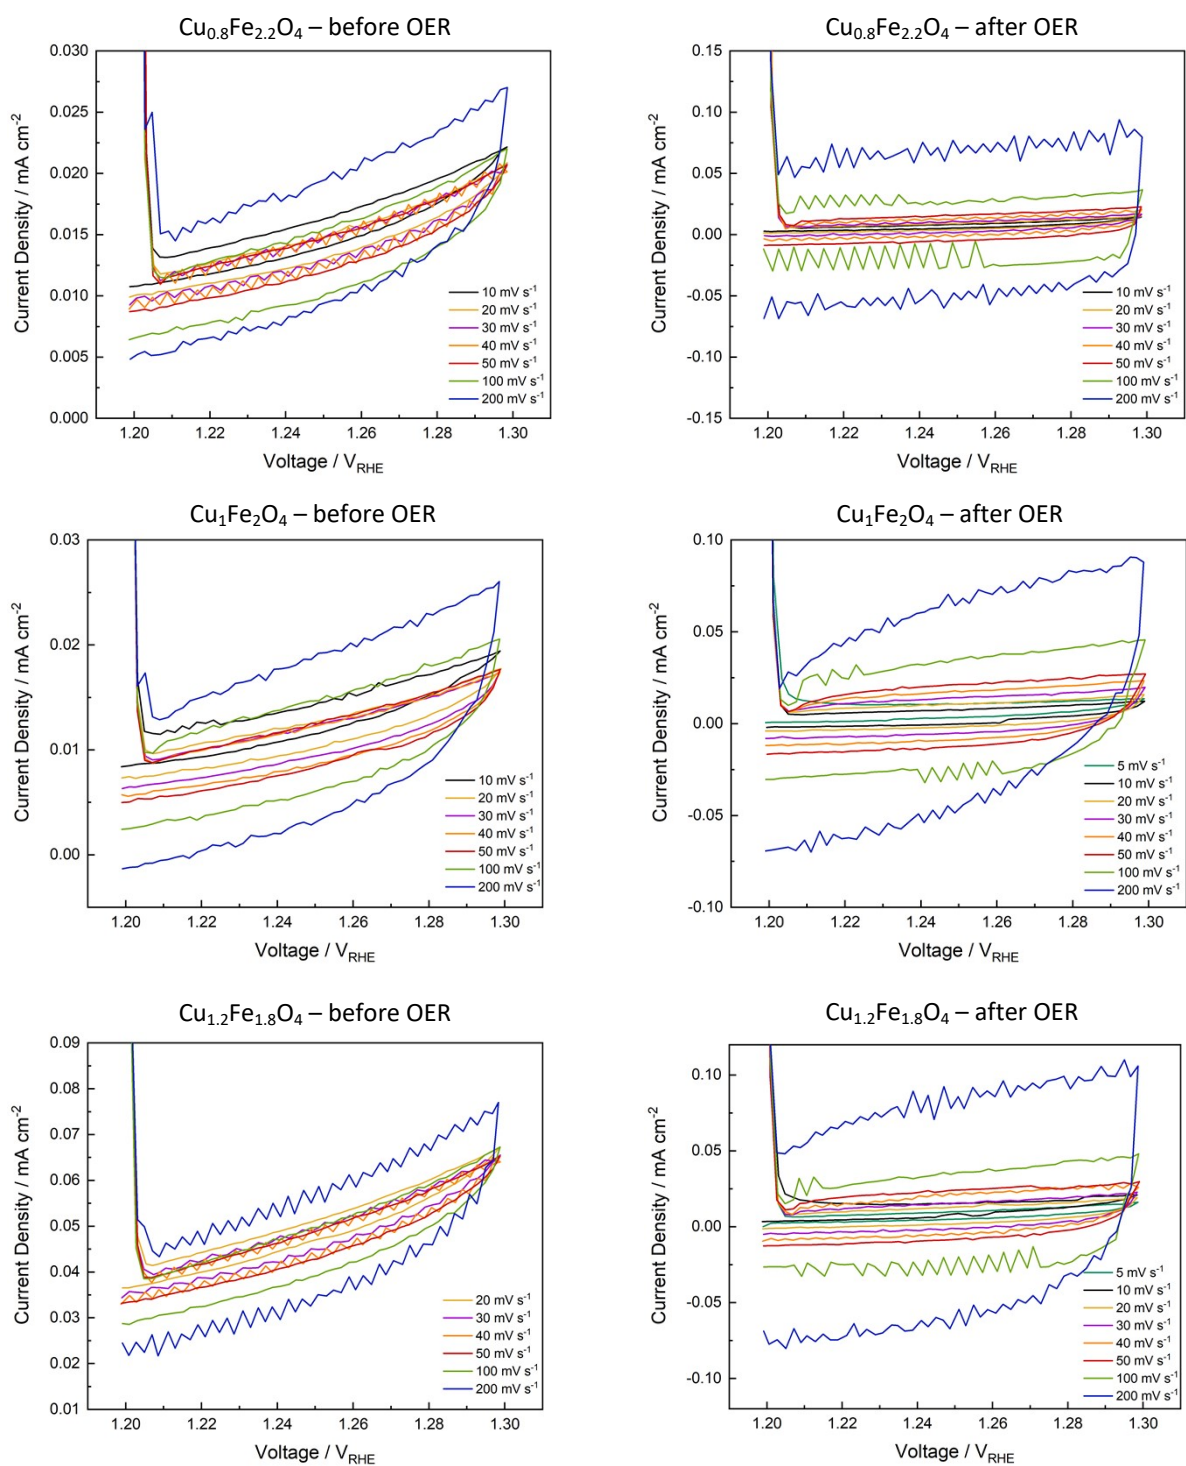

**Figure S13** Cyclic voltammograms in a non-Faradaic region before and after the OER at different scan rates, to determine the double layer capacitance for  $\text{CuFe}_2\text{O}_4$  with a low Cu-content ( $\text{Cu}_{0.8}\text{Fe}_{2.2}\text{O}_4$  –(a) and (b)), stoichiometric  $\text{CuFe}_2\text{O}_4$  (c) and (d), and with a high Cu-content ( $\text{Cu}_{1.2}\text{Fe}_{1.8}\text{O}_4$  - (e) and (f)).

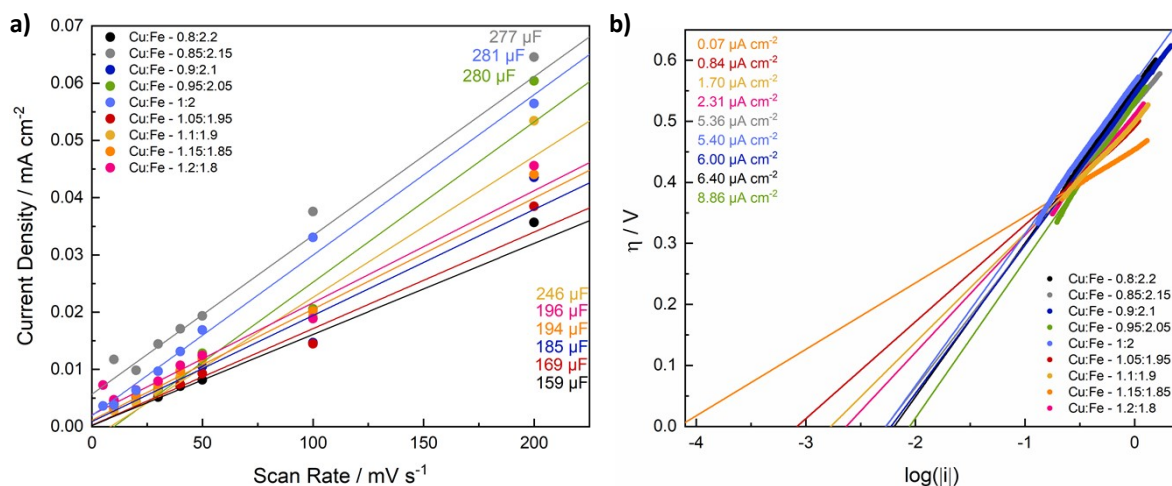

**Figure S14**  $C_{DL}$  determined from the average of anodic and cathodic charging currents after the OER experiments (a) and exchange current densities extrapolated from the Tafel plots (b).

**Table S5** ECSA determined before and after the OER and HER, respectively, for  $\text{CuFe}_2\text{O}_4$  of varied composition.

| Cu:Fe- Ratio | ECSA - before OER | ECSA – after OER  | ECSA – before HER | ECSA – after HER  |
|--------------|-------------------|-------------------|-------------------|-------------------|
| 0.8:2.2      | 0.6 $\text{cm}^2$ | 4.0 $\text{cm}^2$ | 15 $\text{cm}^2$  | 180 $\text{cm}^2$ |
| 0.85:2.15    | 4.8 $\text{cm}^2$ | 6.9 $\text{cm}^2$ | 39 $\text{cm}^2$  | 315 $\text{cm}^2$ |
| 0.9:2.1      | 1.8 $\text{cm}^2$ | 4.6 $\text{cm}^2$ | 24 $\text{cm}^2$  | 66 $\text{cm}^2$  |
| 0.95:2.05    | 3.2 $\text{cm}^2$ | 7.0 $\text{cm}^2$ | 35 $\text{cm}^2$  | 173 $\text{cm}^2$ |
| 1:2          | 1.0 $\text{cm}^2$ | 7.0 $\text{cm}^2$ | 74 $\text{cm}^2$  | 224 $\text{cm}^2$ |
| 1.05:1.95    | 3.9 $\text{cm}^2$ | 4.2 $\text{cm}^2$ | 231 $\text{cm}^2$ | 151 $\text{cm}^2$ |
| 1.1:1.9      | 3.2 $\text{cm}^2$ | 6.2 $\text{cm}^2$ | 161 $\text{cm}^2$ | 450 $\text{cm}^2$ |
| 1.15:1.855   | 5.3 $\text{cm}^2$ | 4.9 $\text{cm}^2$ | 196 $\text{cm}^2$ | 162 $\text{cm}^2$ |
| 1.2:1.8      | 1.4 $\text{cm}^2$ | 4.9 $\text{cm}^2$ | 178 $\text{cm}^2$ | 610 $\text{cm}^2$ |

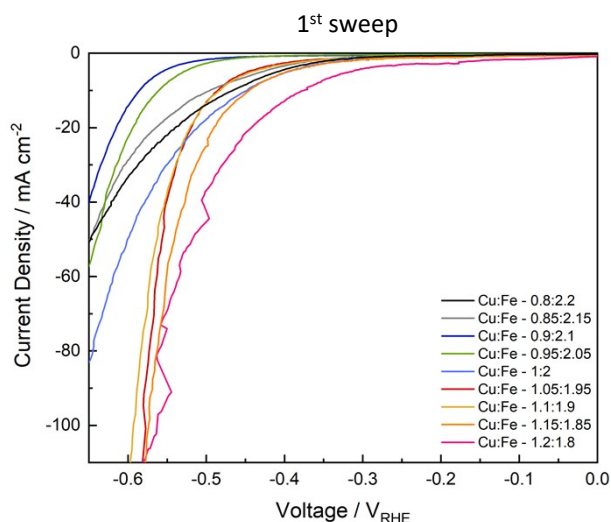

**Figure S15** Initial LSV curve before the HER for  $\text{CuFe}_2\text{O}_4$  of varied composition.

**Figure S16** Development of the current density with the number of LSV scans for a stoichiometric  $\text{CuFe}_2\text{O}_4$  (a)

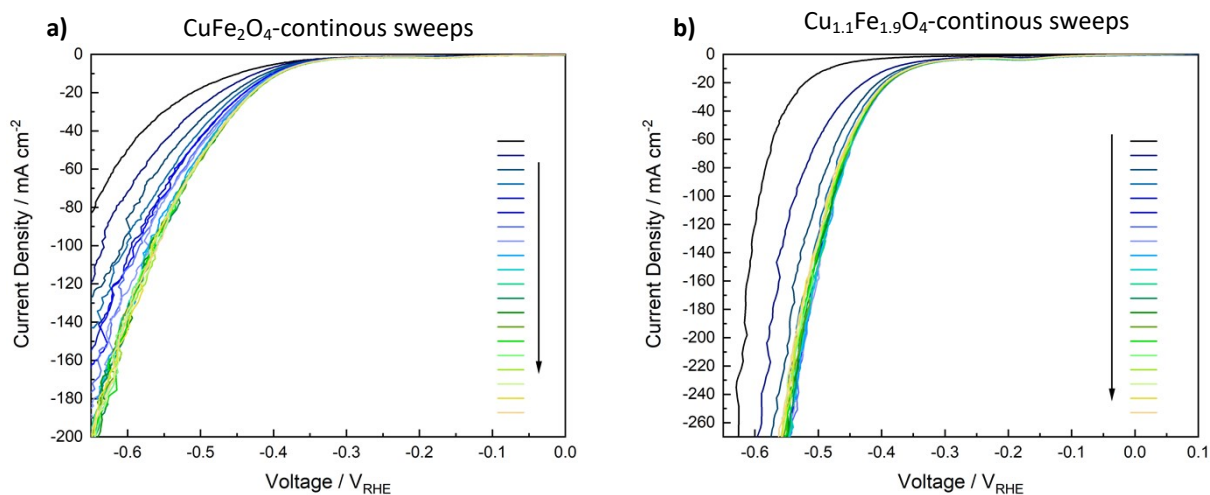

and the most active composition  $\text{Cu}_{1.1}\text{Fe}_{1.9}\text{O}_4$  (b).

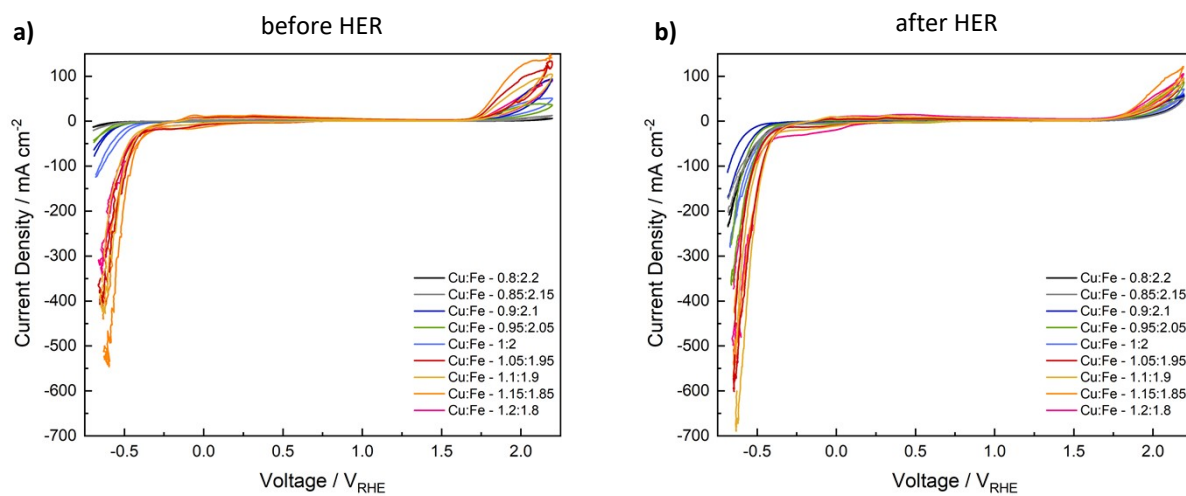

**Figure S17** Cyclic voltammograms 3<sup>rd</sup> cycle) before (a) and after (b) the HER for  $\text{CuFe}_2\text{O}_4$  of varied composition.

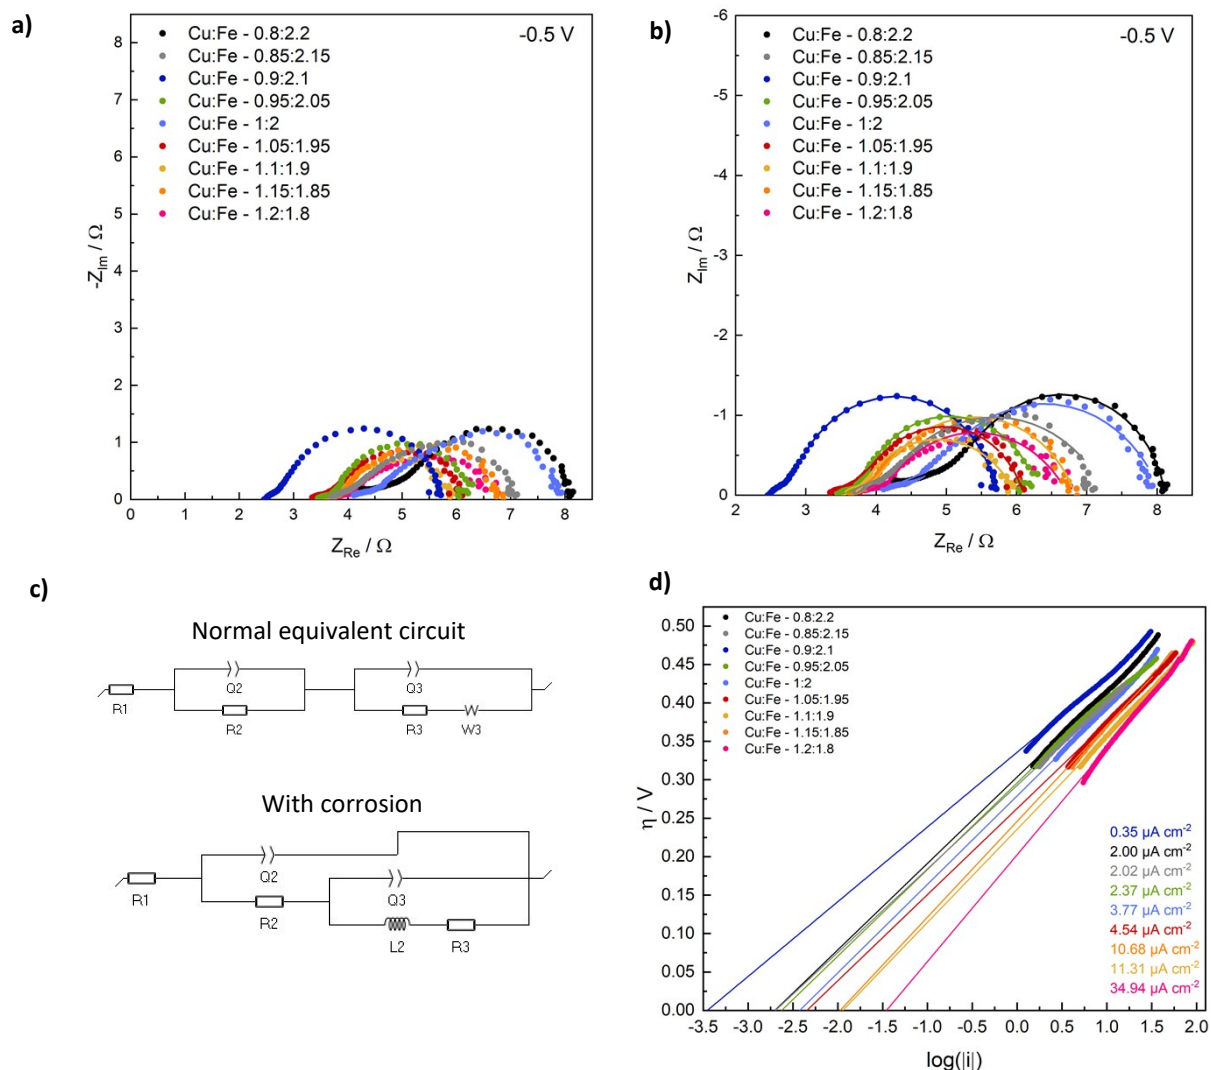

**Figure S18** Nyquist plots after the HER at -0.5 V (a), corresponding fits (b), and equivalent circuits used for the plots after the HER, as well as potential equivalent circuits taking into account corrosion phenomena/ adsorbed species (c), and exchange current densities derived from Tafel plots (d).

**Table S6** Fit parameters for the Nyquist plots after the HER.

| Cu/Fe | $R_1 / \Omega$ | $Q_2 / F \cdot s^{(a-1)}$ | $R_2 / \Omega$ | $Q_3 / F \cdot s^{(a-1)}$ | $R_3 / \Omega$ | $Q_4 / F \cdot s^{(a-1)}$ | $R_4 / \Omega$ |
|-------|----------------|---------------------------|----------------|---------------------------|----------------|---------------------------|----------------|
| 0.36  | 2.156          | 0.014                     | 0.952          | 0.00382                   | 2.522          | 0.00341                   | 2.528          |
| 0.40  | 3.748          | 0.00153                   | 0.385          | 0.00885                   | 3.144          |                           |                |
| 0.43  | 2.463          | 0.00298                   | 2.759          | 0.017                     | 0.493          |                           |                |
| 0.46  | 3.447          | 0.00757                   | 0.356          | 0.00745                   | 2.507          |                           |                |
| 0.5   | 4.008          | 1.18E+19                  | 0.335          | 0.03                      | 1.18           | 0.00695                   | 2.903          |
| 0.54  | 3.341          | 0.023                     | 0.69           | 0.00619                   | 2.082          |                           |                |
| 0.58  | 3.529          | 0.0025                    | 0.241          | 0.012                     | 2.218          |                           |                |
| 0.62  | 3.654          | 0.017                     | 0.402          | 0.00701                   | 2.781          |                           |                |

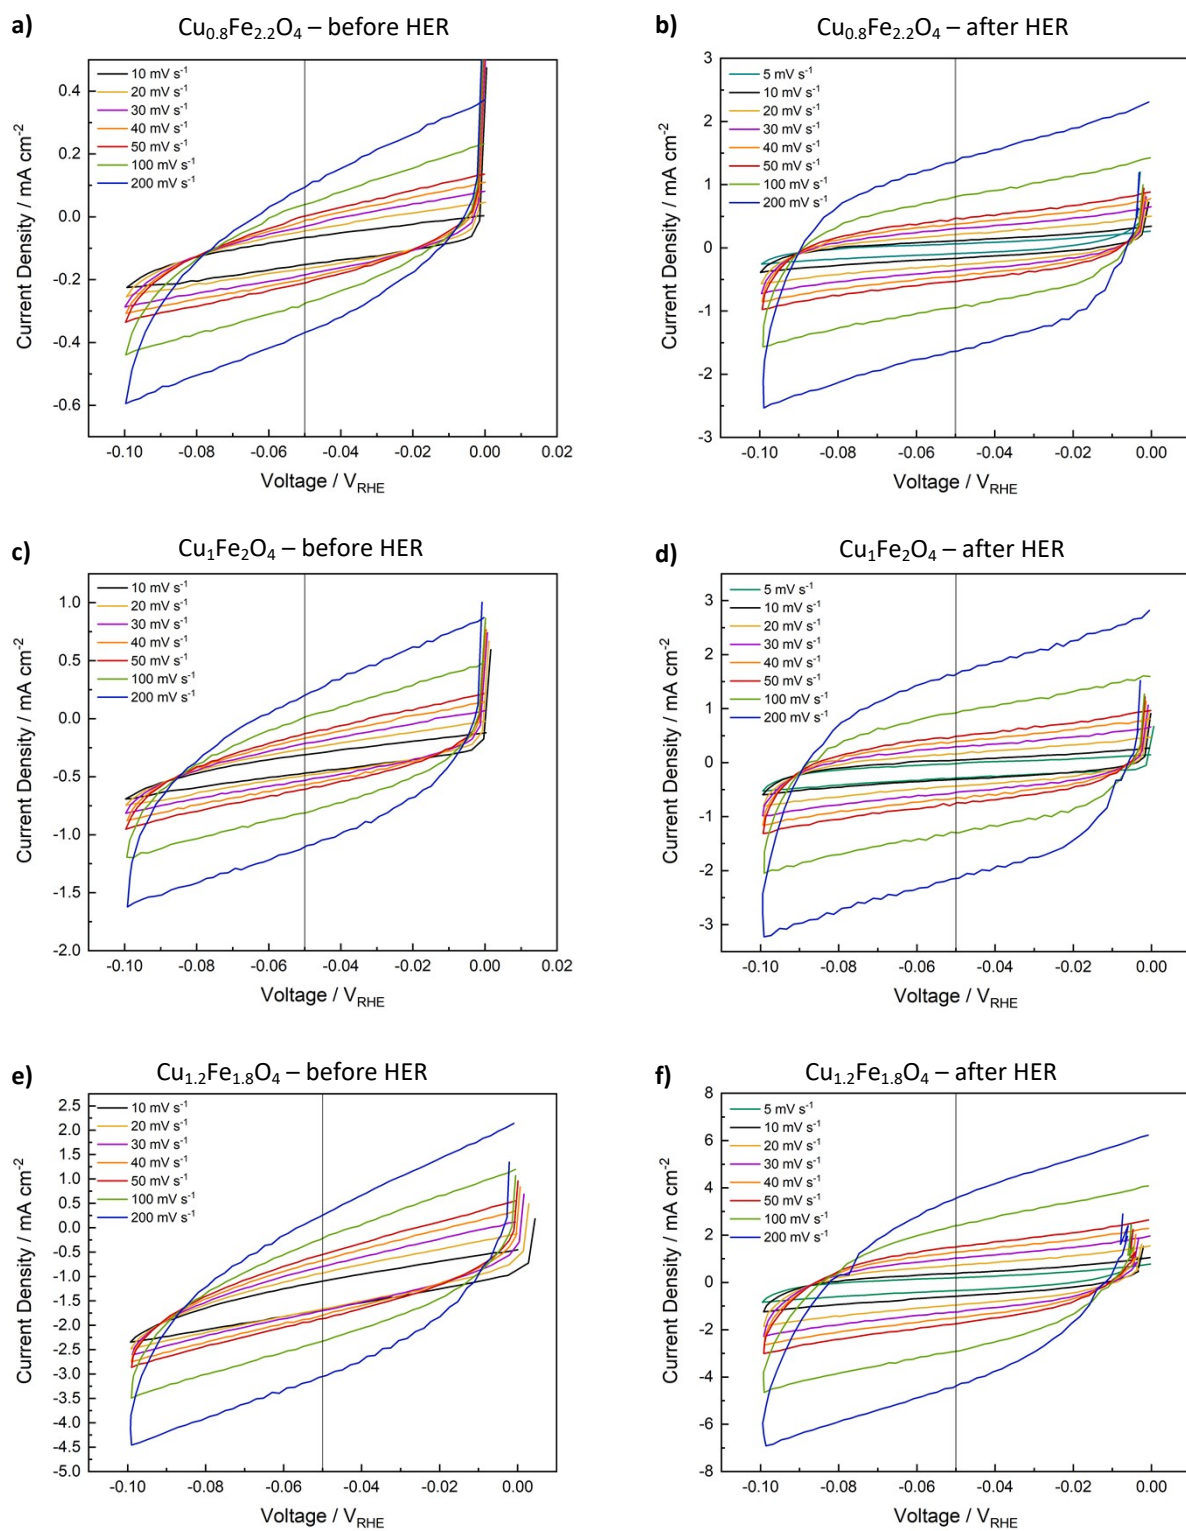

**Figure S19** Cyclic voltammograms before and after the HER, to determine double layer capacitance for with a low Cu-content ( $\text{Cu}_{0.8}\text{Fe}_{2.2}\text{O}_4$  –(a) and (b)), stoichiometric  $\text{CuFe}_2\text{O}_4$  (c) and (d), and with a high Cu-content ( $\text{Cu}_{1.2}\text{Fe}_{1.8}\text{O}_4$  - (e) and (f)).

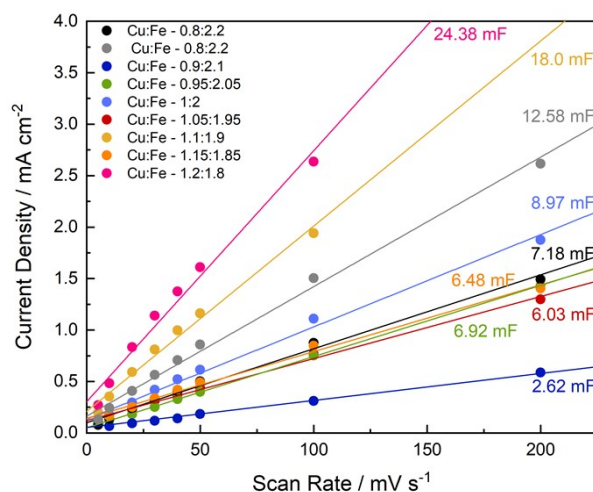

**Figure S20** Double layer capacitance determined from the average of anodic and cathodic charging current after the HER.

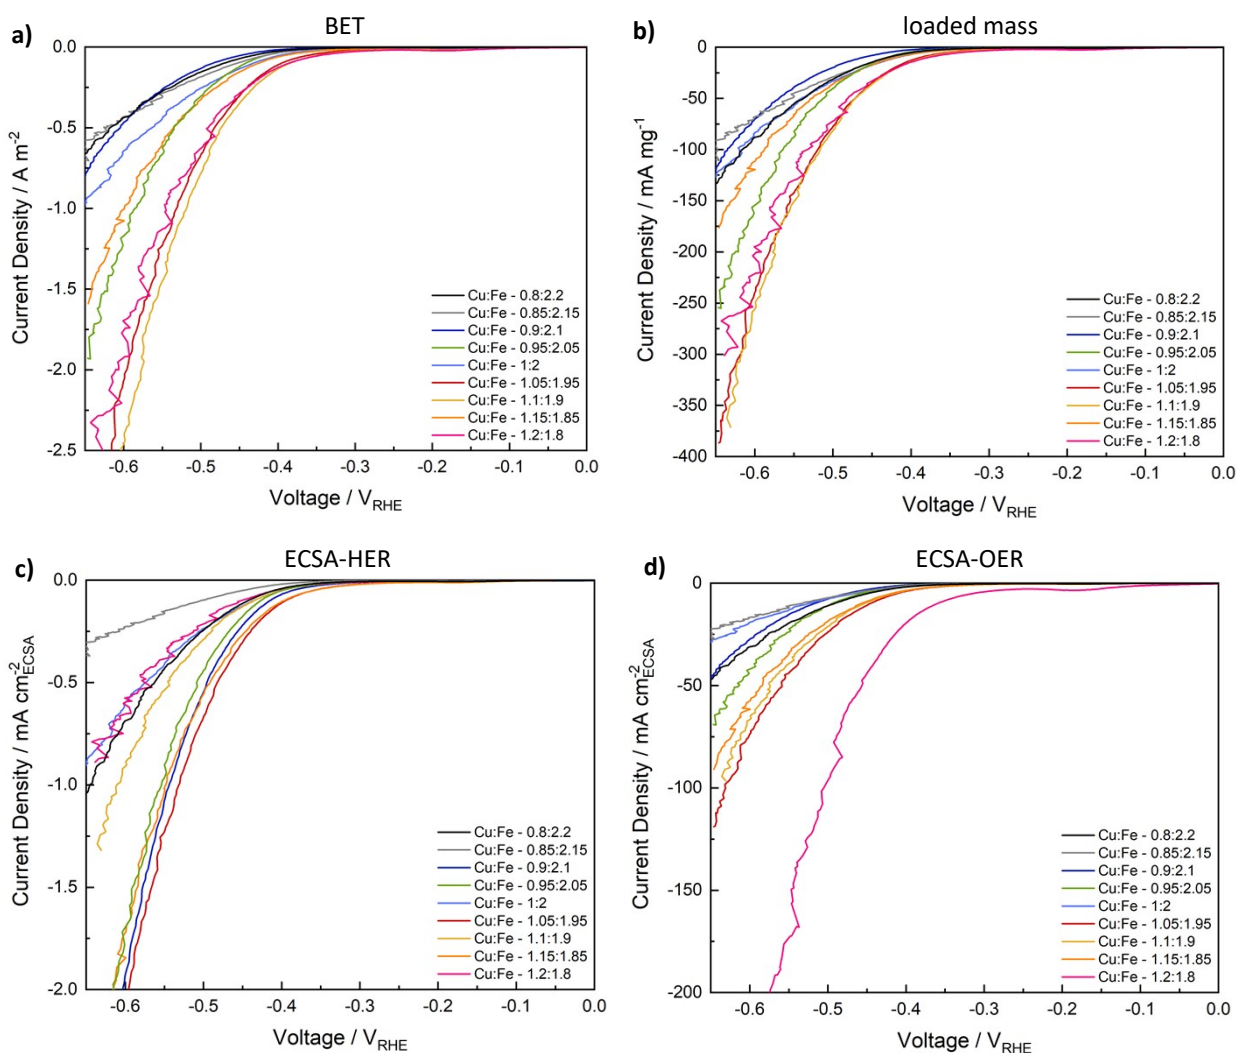

**Figure S21** Final LSV curves normalised to the BET surface area (a), the loaded mass (b), the ECSA determined after the HER (c) and the ECSA determined between 1.2 and 1.3 V after the OER.



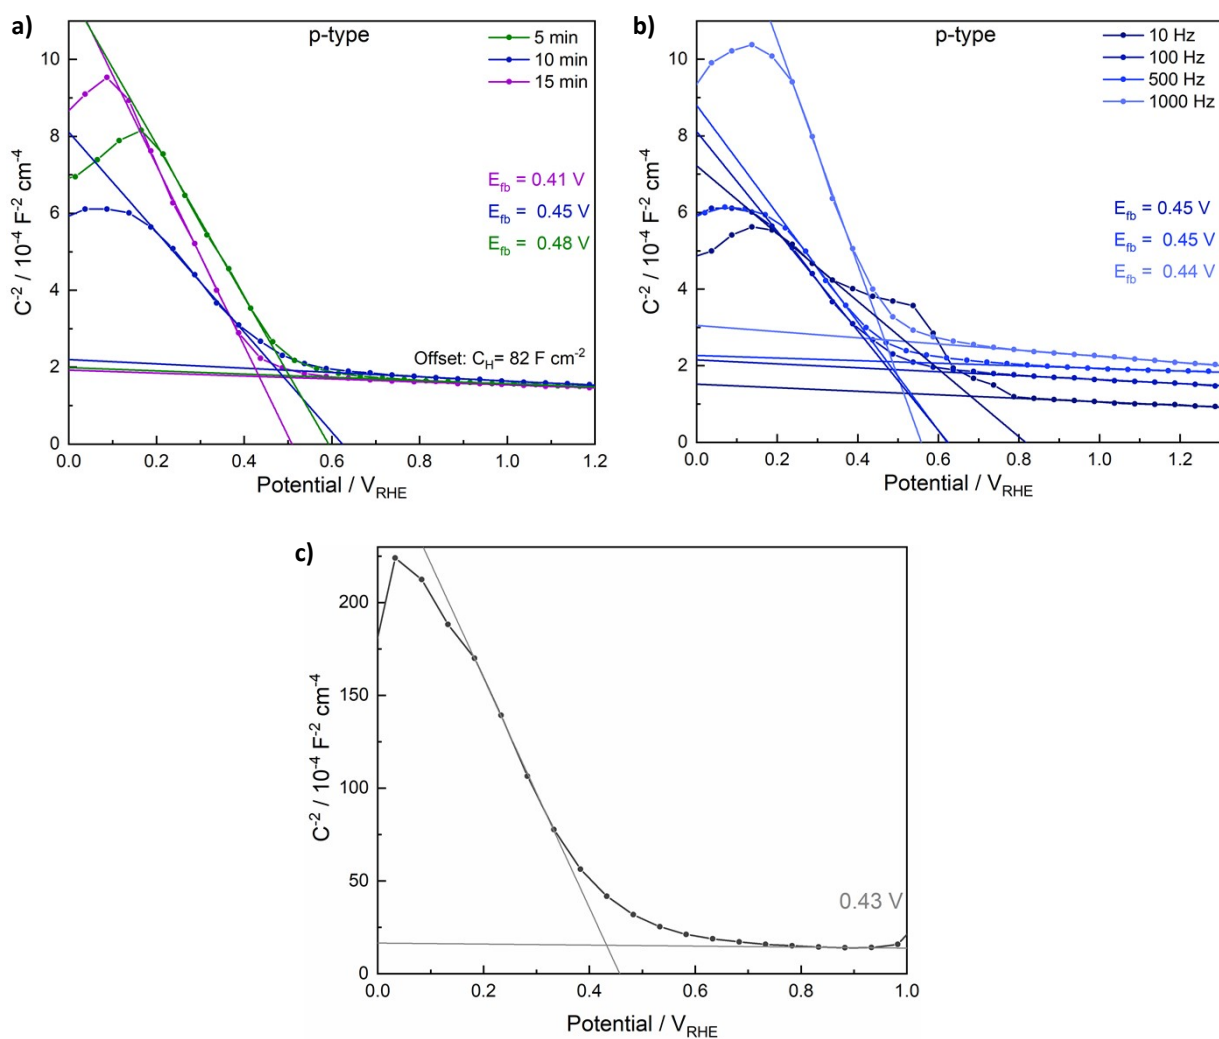

**Figure S22** Mott-Schottky plots at 100 Hz for  $\text{CuFe}_2\text{O}_4$  electrodes (stoichiometric) prepared via electrophoretic deposition for different times at 15 V (a) and for the electrode with a deposition time of 10 min at various frequencies (b). An additional measurement at 1000 Hz in 1 M KOH was performed in order to validate the pH dependence of the flat band potential (c).

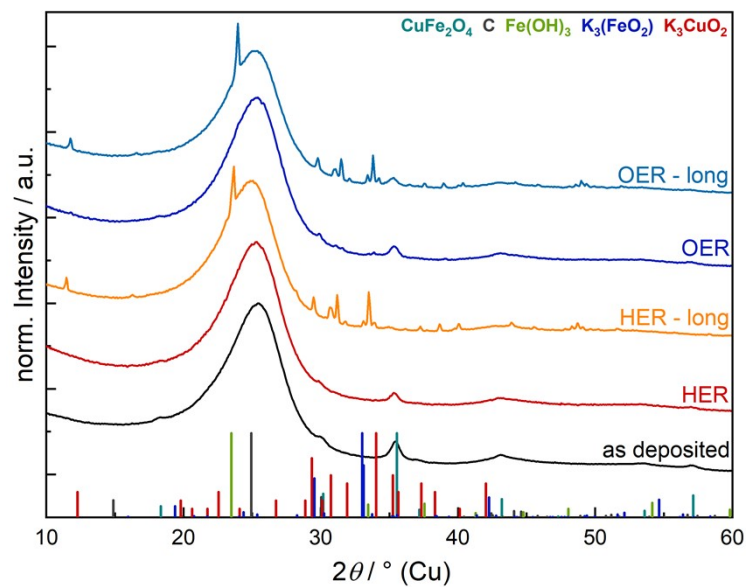

**Figure S23** XRD patterns of electrodes before and after the HER and OER, respectively. Following ICDD reference cards were used for the identification: 01-077-0010 –  $\text{CuFe}_2\text{O}_4$ ; 01-074-2329 – C (graphite); 00-046-1436 –  $\text{Fe}(\text{OH})_3$ ; 00-038-0971 –  $\text{K}_3\text{CuO}_2$ ; 01-081-1805 –  $\text{K}_3(\text{FeO}_2)$ .

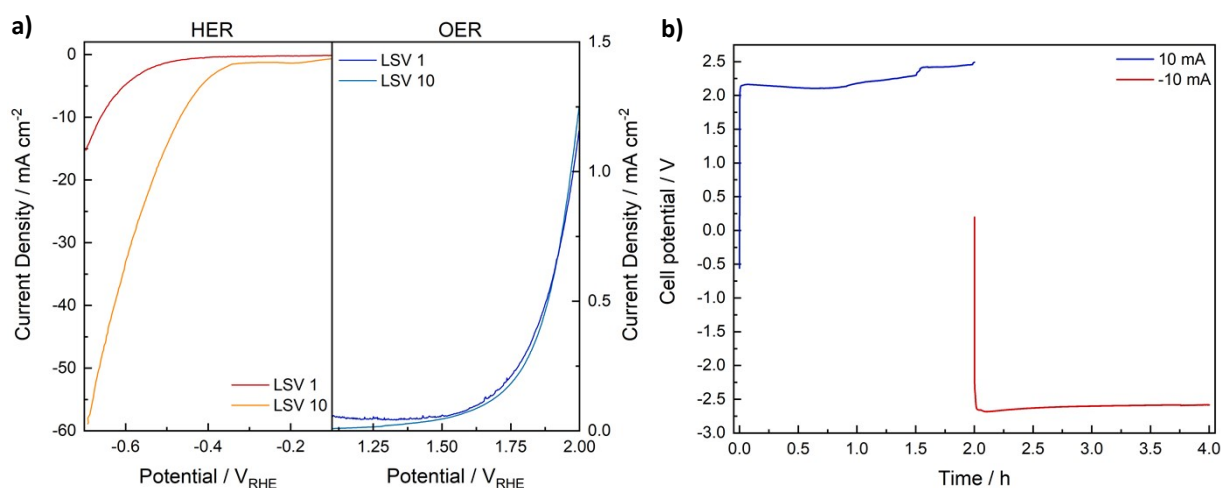

**Figure S24** LSV scans for both HER and OER in a three-electrode setup with the counter electrode being similarly made by drop-casting stoichiometric CuFe<sub>2</sub>O<sub>4</sub> onto carbon paper (a), and subsequent cell potential measured for first 10 mA and then -10 mA at the working electrode in the same setup (b).

**Table S7** Overpotentials for the ORR with CuFe<sub>2</sub>O<sub>4</sub> with different Cu/Fe-ratios.

| Cu:Fe-Ratio | $\eta_{\text{ORR}} - 10 \text{ mA cm}^{-2}$ | $\eta_{\text{ORR}} - 5 \text{ mA cm}^{-2}$ |
|-------------|---------------------------------------------|--------------------------------------------|
| 0.8:2.2     | 767 mV                                      | 639 mV                                     |
| 0.85:2.15   | 656 mV                                      | 577 mV                                     |
| 0.9:2.1     | 762 mV                                      | 643 mV                                     |
| 0.95:2.05   | 722 mV                                      | 617 mV                                     |
| 1:2         | 720 mV                                      | 631 mV                                     |
| 1.05:1.95   | 708 mV                                      | 608 mV                                     |
| 1.1:1.9     | 765 mV                                      | 646 mV                                     |
| 1.15:1.855  | 726 mV                                      | 614 mV                                     |
| 1.2:1.8     | 714 mV                                      | 611 mV                                     |

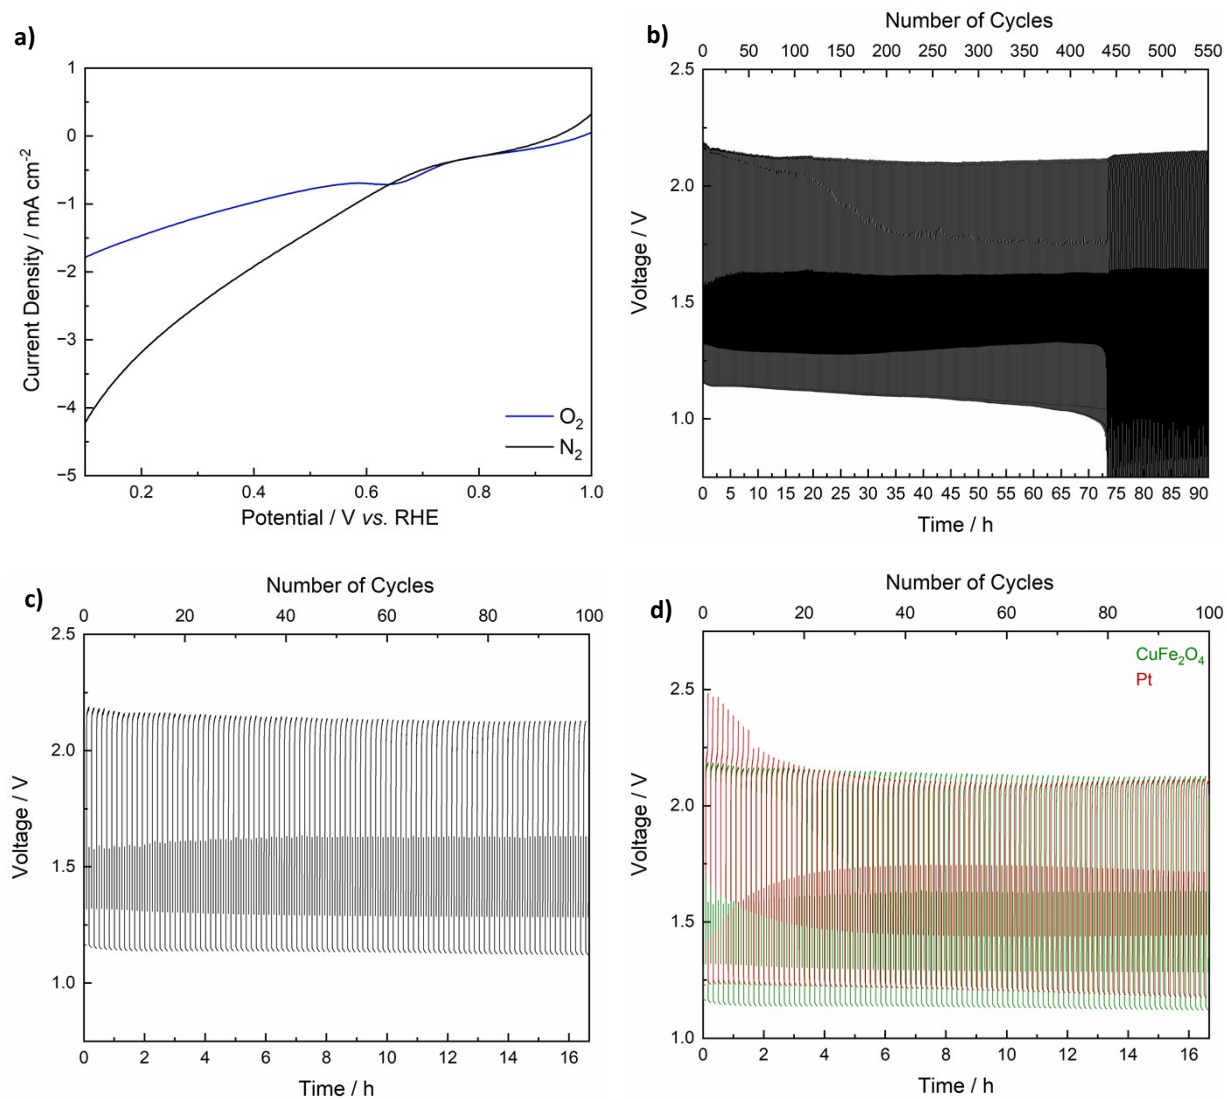

**Figure S25** The 10<sup>th</sup> consecutive LSV scan for the bare GDL in O<sub>2</sub> and N<sub>2</sub> is shown in (a). Repeated charge/discharge cycles (5 min each) for a CuFe<sub>2</sub>O<sub>4</sub> GDE in the Zn-air battery (50 mA cm<sup>-2</sup>) over 550 cycles (b), and an excerpt of the first 100 cycles (c). The comparison with the commercial Pt/C-GDE is depicted in (d).

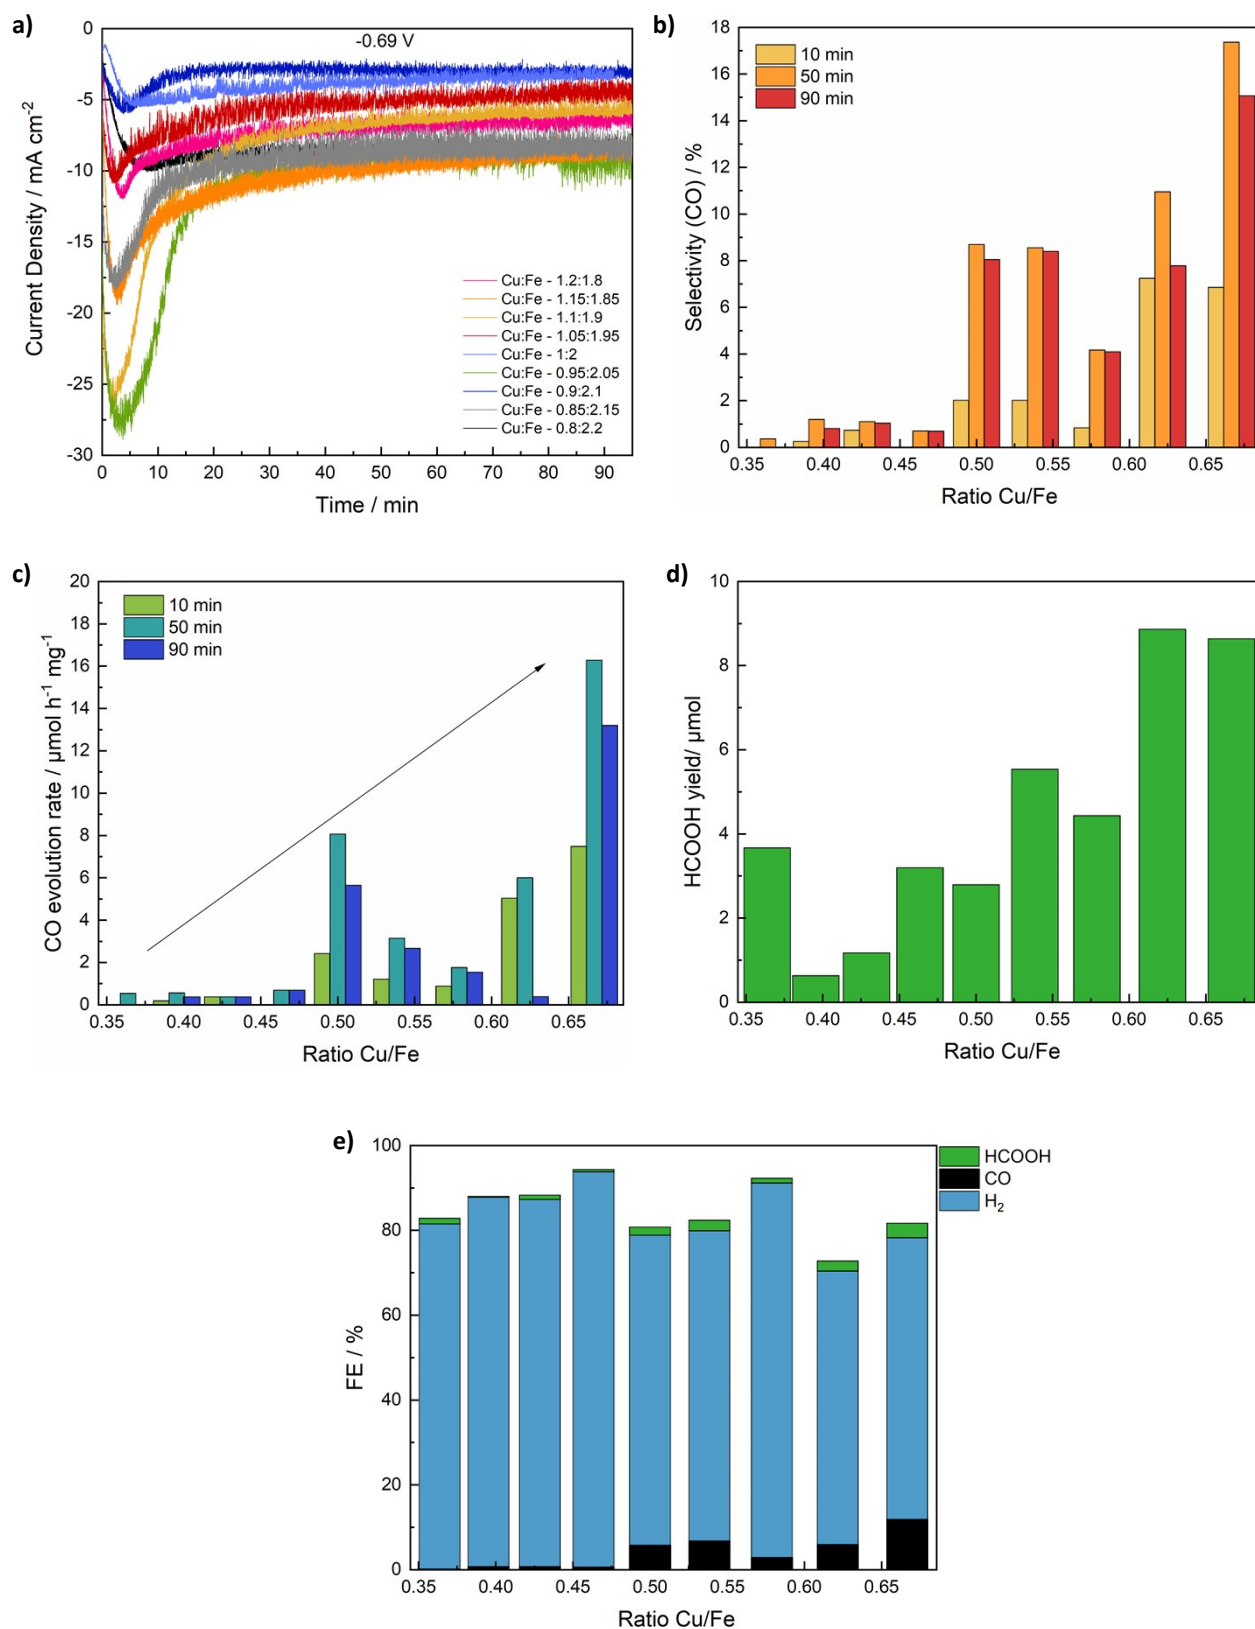

**Figure S26** Current densities measured for the CO<sub>2</sub>RR with CuFe<sub>2</sub>O<sub>4</sub> of different composition at a potential of -0.69 V vs. RHE (a), calculated selectivity for CO based on the detected gaseous products (b), CO yields normalised to mass loading (c), measured amounts of HCOOH (d) and sum of the Faradaic efficiencies (e).

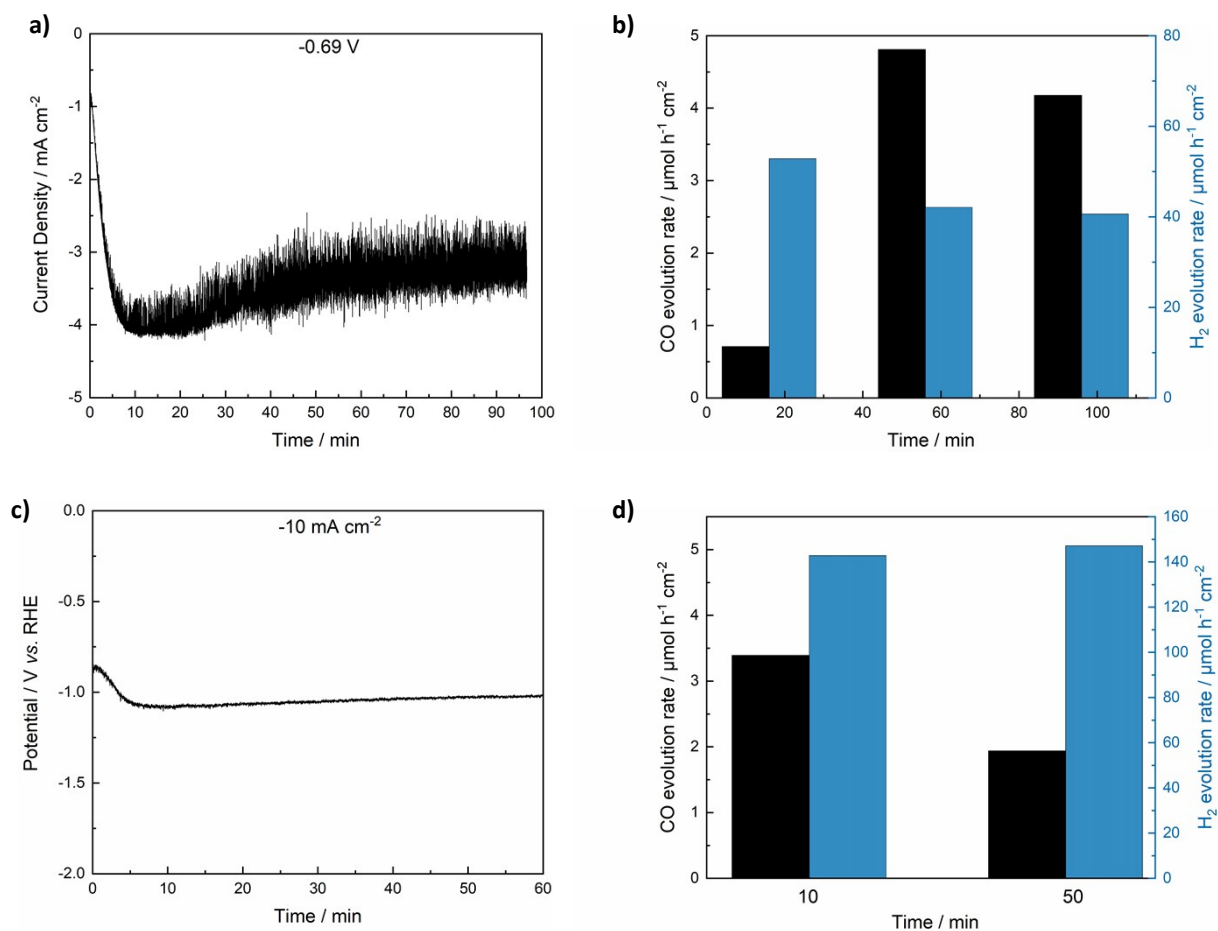

**Figure S27** Current densities measured for CuFe<sub>2</sub>O<sub>4</sub> during chronoamperometry at -0.69 V for the electrochemical CO<sub>2</sub>RR, with a second CuFe<sub>2</sub>O<sub>4</sub> electrode used as counter electrode (a). The corresponding CO and H<sub>2</sub> yields are shown in (b). Subsequently, the working electrode potential was monitored at 10 mA cm<sup>-2</sup> (c), and the corresponding CO and H<sub>2</sub> yields are depicted in (d).

**Table 8** Activity comparison with related electrocatalysts.

|                  | Material                                                  | Overpotential                         | Products                              | Electrolyte & Substrate  | Synthesis                                                                 | Reference        |
|------------------|-----------------------------------------------------------|---------------------------------------|---------------------------------------|--------------------------|---------------------------------------------------------------------------|------------------|
| HER              | Cu-Fe <sub>3</sub> O <sub>4</sub>                         | 222 mV (50 mA cm <sup>-2</sup> )      |                                       | 1 M KOH, Fe-foam         | Hydrothermal                                                              | [3]              |
|                  | Fe <sub>3</sub> O <sub>4</sub>                            | 315 mV (50 mA cm <sup>-2</sup> )      |                                       | 1 M KOH, Fe-foam         | Hydrothermal                                                              | [3]              |
|                  | Fe <sub>2</sub> O <sub>3</sub> -NC                        | 245-438 mV (10 mA cm <sup>-2</sup> )  |                                       | 1 M KOH, GC              | Calcination of nitrates with C <sub>2</sub> H <sub>4</sub> N <sub>4</sub> | [4]              |
|                  | Fe <sub>2</sub> O <sub>3</sub>                            | 312-423 mV (10 mA cm <sup>-2</sup> )  |                                       | 0.1 M KOH, GC            | Hydrothermal                                                              | [5]              |
|                  | Fe <sub>2</sub> O <sub>3</sub>                            | 302 mV (10 mA cm <sup>-2</sup> )      |                                       | 1 M KOH, Fe-foam         | CVD                                                                       | [6]              |
|                  | Cu foam                                                   | 372 mV (10 mA cm <sup>-2</sup> )      |                                       | 1 M KOH                  |                                                                           | [7]              |
|                  | Cu                                                        | 320 – 740 mV (5 mA cm <sup>-2</sup> ) |                                       | 0.1 M KOH                |                                                                           | [8]              |
|                  | <b>This work</b>                                          |                                       | <b>342 mV (10 mA cm<sup>-2</sup>)</b> |                          | <b>1 M KOH, CP</b>                                                        | <b>Microwave</b> |
| OER              | CuFe <sub>2</sub> O <sub>4</sub>                          | 369 mV (10 mA cm <sup>-2</sup> )      |                                       | 1 M KOH, Ni-foam         | Sol-gel synthesis + ball milling                                          | [9]              |
|                  | CuFe <sub>2</sub> O <sub>4</sub> fibres                   | 367 mV (10 mA cm <sup>-2</sup> )      |                                       | 1 M KOH, Ni-foam         | Solution blow spinning                                                    | [10]             |
|                  | CuFe <sub>2</sub> O <sub>4</sub> @porous carbon nanowires | 359 mV (10 mA cm <sup>-2</sup> )      |                                       | 1 M KOH, self supported  | Electrospinning                                                           | [11]             |
|                  | CuFe <sub>2</sub> O <sub>4</sub>                          | 474 mV (10 mA cm <sup>-2</sup> )      |                                       | 1 M KOH RDE (GC)         | Calcination of acetate precursors                                         | [11]             |
|                  | Fe <sub>2</sub> O <sub>3</sub>                            | 551 mV (10 mA cm <sup>-2</sup> )      |                                       | 1 M KOH RDE (GC)         | Calcination of acetate precursors                                         | [11]             |
|                  | FeOOH                                                     | 853 mV (10 mA cm <sup>-2</sup> )      |                                       | 1 M KOH, Ti              | Hydrothermal                                                              | [12]             |
|                  | Fe <sub>3</sub> O <sub>4</sub>                            | 415 mV (10 mA cm <sup>-2</sup> )      |                                       | 1 M KOH, Ti              | Hydrothermal + annealing in Ar/H <sub>2</sub>                             | [12]             |
|                  | CuO                                                       | 475 mV (10 mA cm <sup>-2</sup> )      |                                       | 1 M KOH, GC/ FTO         | In-situ from a Cu(II)-ethylenediamine complex                             | [13]             |
|                  | CuO/Ni                                                    | 364 mV (10 mA cm <sup>-2</sup> )      |                                       | 1 M KOH, Ni foam         | electrodeposition                                                         |                  |
|                  | CuO                                                       | 420 mV (10 mA cm <sup>-2</sup> )      |                                       | 1 M KOH, GC              | Molten salt                                                               | [14]             |
| <b>This work</b> |                                                           | <b>684 mV (10 mA cm<sup>-2</sup>)</b> |                                       | <b>1 M KOH, CP</b>       | <b>Microwave</b>                                                          |                  |
| ORR              | Cu-CuFe <sub>2</sub> O <sub>4</sub> /C                    | Onset: 884 mV*                        |                                       | 0.1 M KOH, RDE, 1600 rpm | Solvothermal                                                              | [15]             |
|                  | Fe <sub>2</sub> O <sub>3</sub>                            | Onset: -890 mV vs Ag/Ag Cl*           |                                       | 0.1 M KOH, RDE, 1600 rpm | Solvothermal                                                              | [15]             |
|                  | γ-Fe <sub>2</sub> O <sub>3</sub> /δ-FeOOH                 | Onset 730 mV                          |                                       | 0.5 M KOH, RDE           | Non-stationary electrolysis                                               | [16]             |
|                  | Fe <sub>3</sub> O <sub>4</sub> /Fe/C                      | Onset: ~824 mV*                       |                                       | 6 M KOH, GDE on Ni       | Microwave sintering                                                       | [17]             |

---

This work                      Onset: ~800 mV                      4 M KOH, GDE                      Microwave

\*Assuming a pH of 14

## References

- [1] M. C. Biesinger, *Surf. Interface Anal.* **2017**, *49*, 1325–1334.
- [2] M. C. Biesinger, B. P. Payne, A. P. Grosvenor, L. W. M. Lau, A. R. Gerson, R. S. C. Smart, *Appl. Surf. Sci.* **2011**, *257*, 2717–2730.
- [3] C. Yang, W. Zhong, K. Shen, Q. Zhang, R. Zhao, H. Xiang, J. Wu, X. Li, N. Yang, *Adv. Energy Mater.* **2022**, *12*, DOI 10.1002/aenm.202200077.
- [4] J. Jiang, L. Zhu, Y. Sun, Y. Chen, H. Chen, S. Han, H. Lin, *J. Power Sources* **2019**, *426*, 74–83.
- [5] R. N. Ali, H. Naz, X. Zhu, J. Xiang, G. Hu, B. Xiang, *Mater. Res. Express* **2018**, *6*, DOI 10.1088/2053-1591/aaf0dd.
- [6] Q. Hao, L. Zhang, Y. Gao, D. Cao, J. Zhao, Y. Li, C. Liu, Z. Qiao, W. He, H. Liu, *ACS Appl. Energy Mater.* **2022**, *5*, 1793–1800.
- [7] X. Hu, X. Tian, Y. W. Lin, Z. Wang, *RSC Adv.* **2019**, *9*, 31563–31571.
- [8] P. Farinazzo Bergamo Dias Martins, P. Papa Lopes, E. A. Ticianelli, V. R. Stamenkovic, N. M. Markovic, D. Strmcnik, *Electrochem. commun.* **2019**, *100*, 30–33.
- [9] L. S. Ferreira, T. R. Silva, V. D. Silva, R. A. Raimundo, T. A. Simões, F. J. A. Loureiro, D. P. Fagg, M. A. Morales, D. A. Macedo, *Adv. Powder Technol.* **2022**, *33*, 103391.
- [10] V. D. Silva, L. S. Ferreira, T. A. Simões, E. S. Medeiros, D. A. Macedo, *J. Colloid Interface Sci.* **2019**, *540*, 59–65.
- [11] M. Li, M. Lu, J. Yang, J. Xiao, L. Han, Y. Zhang, X. Bo, *J. Alloys Compd.* **2019**, *809*, 151766.
- [12] L. Gao, C. Tang, J. Liu, L. He, H. Wang, Z. Ke, W. Li, C. Jiang, D. He, L. Cheng, et al., *Energy Environ. Mater.* **2021**, *4*, 392–398.
- [13] X. Liu, S. Cui, M. Qian, Z. Sun, P. Du, *Chem. Commun.* **2016**, *52*, 5546–5549.
- [14] M. Qian, X. Liu, S. Cui, H. Jia, P. Du, *Electrochim. Acta* **2018**, *263*, 318–327.
- [15] B. J. Borah, Y. Yamada, P. Bharali, *ACS Appl. Energy Mater.* **2020**, *3*, 3488–3496.
- [16] T. Molodtsova, M. Gorshenkov, S. Kubrin, A. Saraev, A. Ulyankina, N. Smirnova, *J. Taiwan Inst. Chem. Eng.* **2022**, *140*, 104569.



- [17] Z. Zhang, D. Zhou, J. Liao, X. Bao, S. Luo, *J. Alloys Compd.* **2019**, 786, 134–138.
